# Supplementary material for: Design, synthesis and biological evaluation of rhein–piperazine–furanone hybrids as potential anticancer agents
Source: Royal Society of Chemistry journal article supplement (doi:10.1039/d3md00619k), 2024-01-01
Supplement: d3md00619k1.pdf [file d3md00619k1.pdf]

## Supporting Information

### Design, synthesis and biological evaluation of rhein-piperazine-furanone hybrids as potential anticancer agents

Yu He <sup>1</sup>, Si-Si Zhang <sup>1</sup>, Meng-Xue Wei \*

*State Key Laboratory of High-efficiency Utilization of Coal and Green Chemical Engineering, Ningxia Research Center for Natural Medicine Engineering and Technology, College of Chemistry and Chemical Engineering, Ningxia University, Yinchuan, 750021, China*

\* Corresponding author.

*E-mail address:* weimengxue@nxu.edu.cn (M.-X. Wei)

<sup>1</sup> These authors contributed equally to this work.

### Table of Contents

|                                                                         |    |
|-------------------------------------------------------------------------|----|
| General remark.....                                                     | S1 |
| <sup>1</sup> H NMR, <sup>13</sup> C NMR and HRMS for hybrids 5a–5j..... | S2 |

#### General remark

Reagents and solvents were purchased from Adamas, Aldrich, and Energy Chemical, and used without further purification unless otherwise stated. The progress of the organic chemical reaction was monitored by thin-layer chromatography (TLC) (Qingdao Haiyang Chemical, China). <sup>1</sup>H and <sup>13</sup>C NMR spectra were recorded on a Bruker Avance III 400 MHz spectrometer. The FT-IR spectra recorded on a Shimadzu FTIR-8400S Fourier Transform Infrared Spectrophotometer (400–4000 cm<sup>-1</sup>) with KBr pellets. High-resolution mass spectrums were recorded on a Thermo Fisher LTQ Orbitrap XL. The bioassays were carried out by Wuhan Biofavor Biotech Service Co., Ltd.

**<sup>1</sup>H NMR, <sup>13</sup>C NMR and HRMS for hybrids 5a–5j**

zss-326-H

11.950  
11.789

7.686  
7.683  
7.669  
7.667  
7.643  
7.622  
7.603  
7.260  
7.248  
7.245  
7.226  
7.223  
7.205  
7.202

5.807

3.891  
3.808  
3.703  
3.554  
3.539  
3.529  
3.513  
3.502  
2.164  
2.133  
2.073  
2.056  
2.038  
2.026  
1.617  
1.594  
1.585  
1.331  
1.322  
1.315  
1.290  
1.262  
1.233  
1.182  
1.103  
1.073  
1.044  
1.014  
0.955  
0.930  
0.923  
0.880  
0.864  
0.849  
0.794  
0.767  
0.761  
0.726  
0.710  
0.693

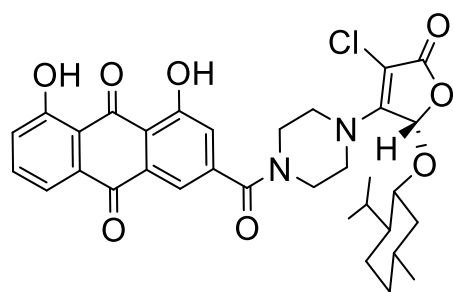

**5a**

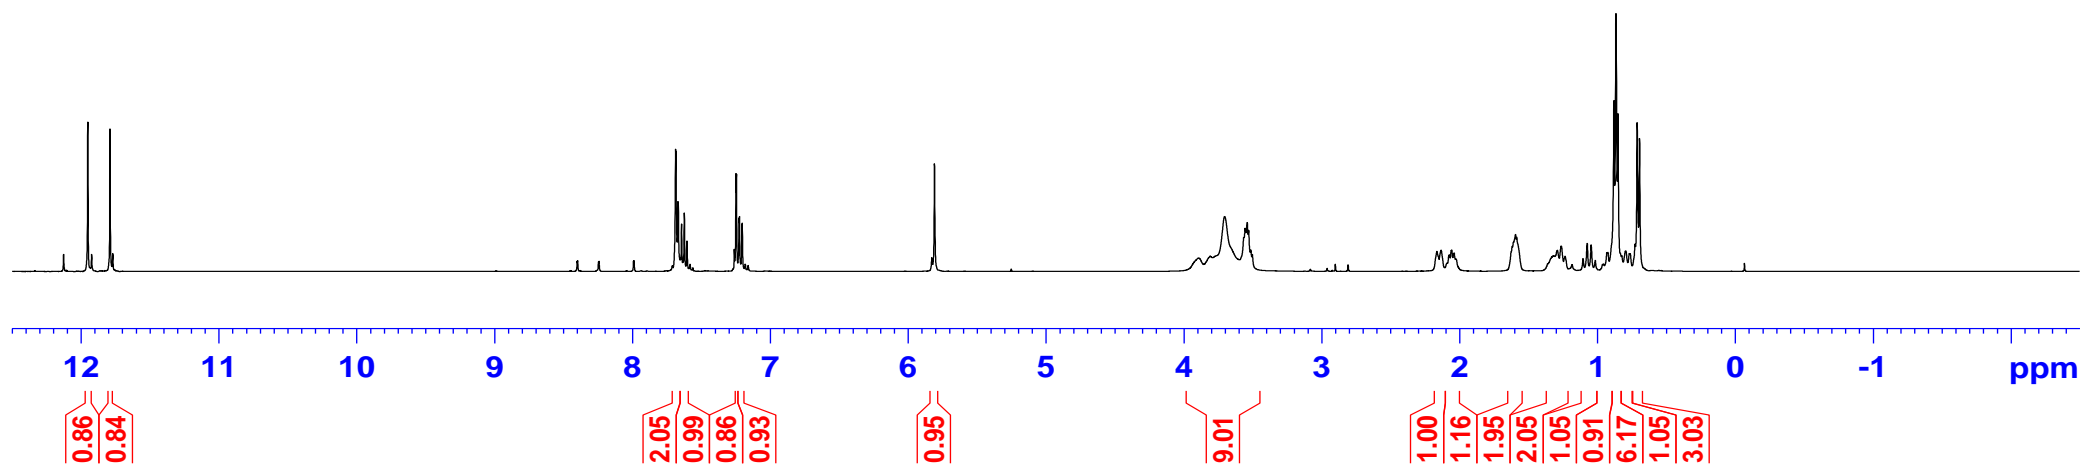

<sup>1</sup>H NMR (400 MHz, CDCl<sub>3</sub>) spectrum of **5a**

zss-326-C

192.15  
180.53  
167.66  
167.33  
162.52  
162.39  
154.90  
143.21  
137.67  
133.89  
132.94  
124.99  
122.47  
120.22  
117.72  
116.31  
115.35  
97.12  
88.87  
81.11  
77.47  
77.16  
76.84  
47.96  
47.35  
42.26  
41.79  
33.73  
31.51  
25.11  
22.57  
22.17  
21.09  
15.66

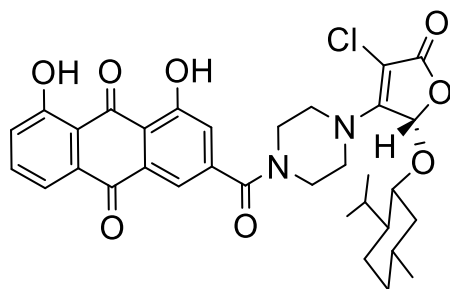

5a

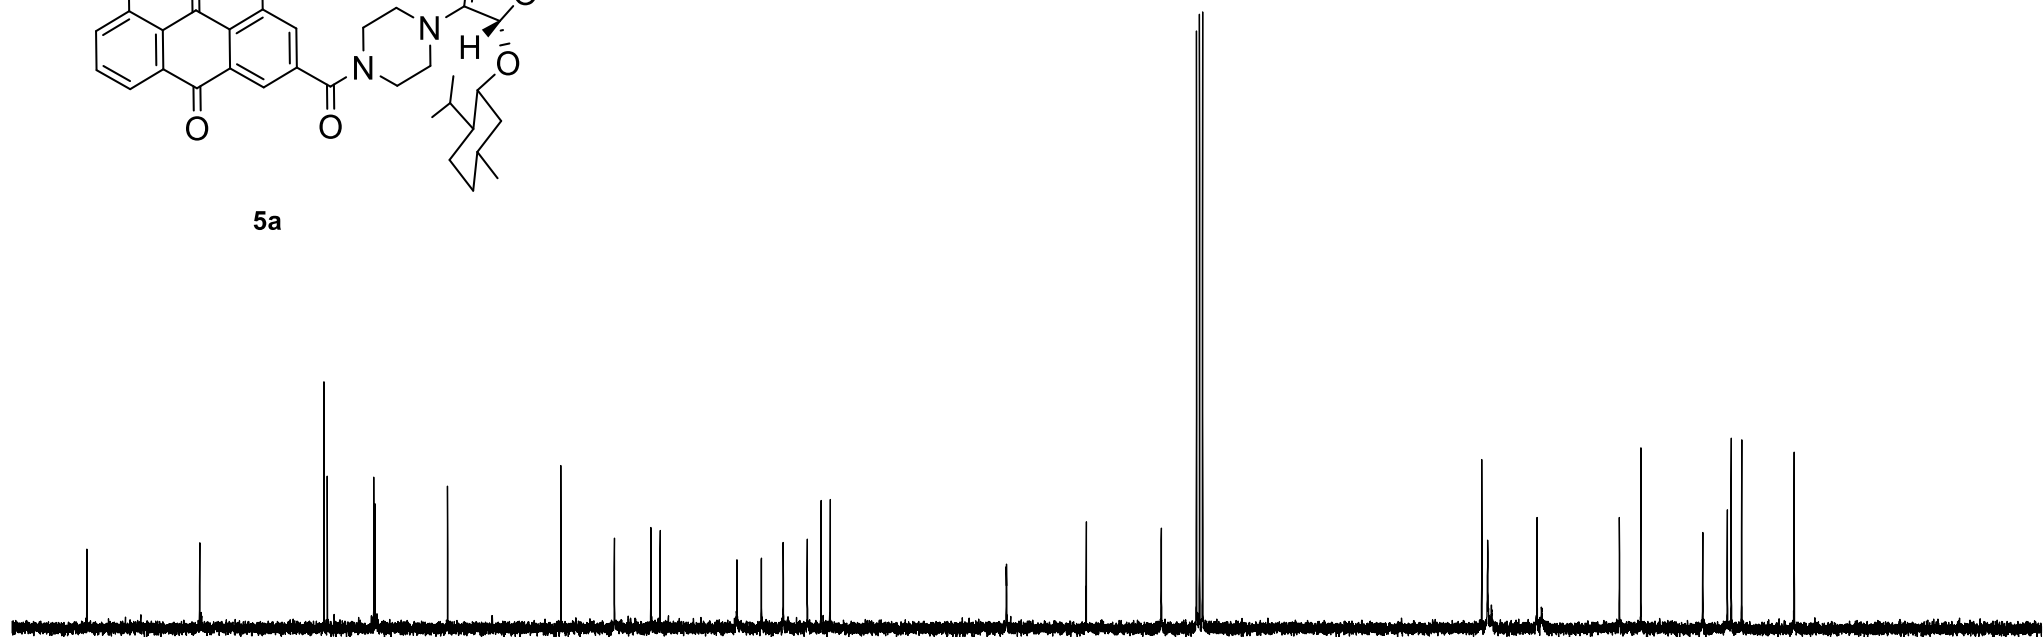

190 180 170 160 150 140 130 120 110 100 90 80 70 60 50 40 30 20 10 0 ppm

<sup>13</sup>C NMR (101 MHz, CDCl<sub>3</sub>) spectrum of 5a

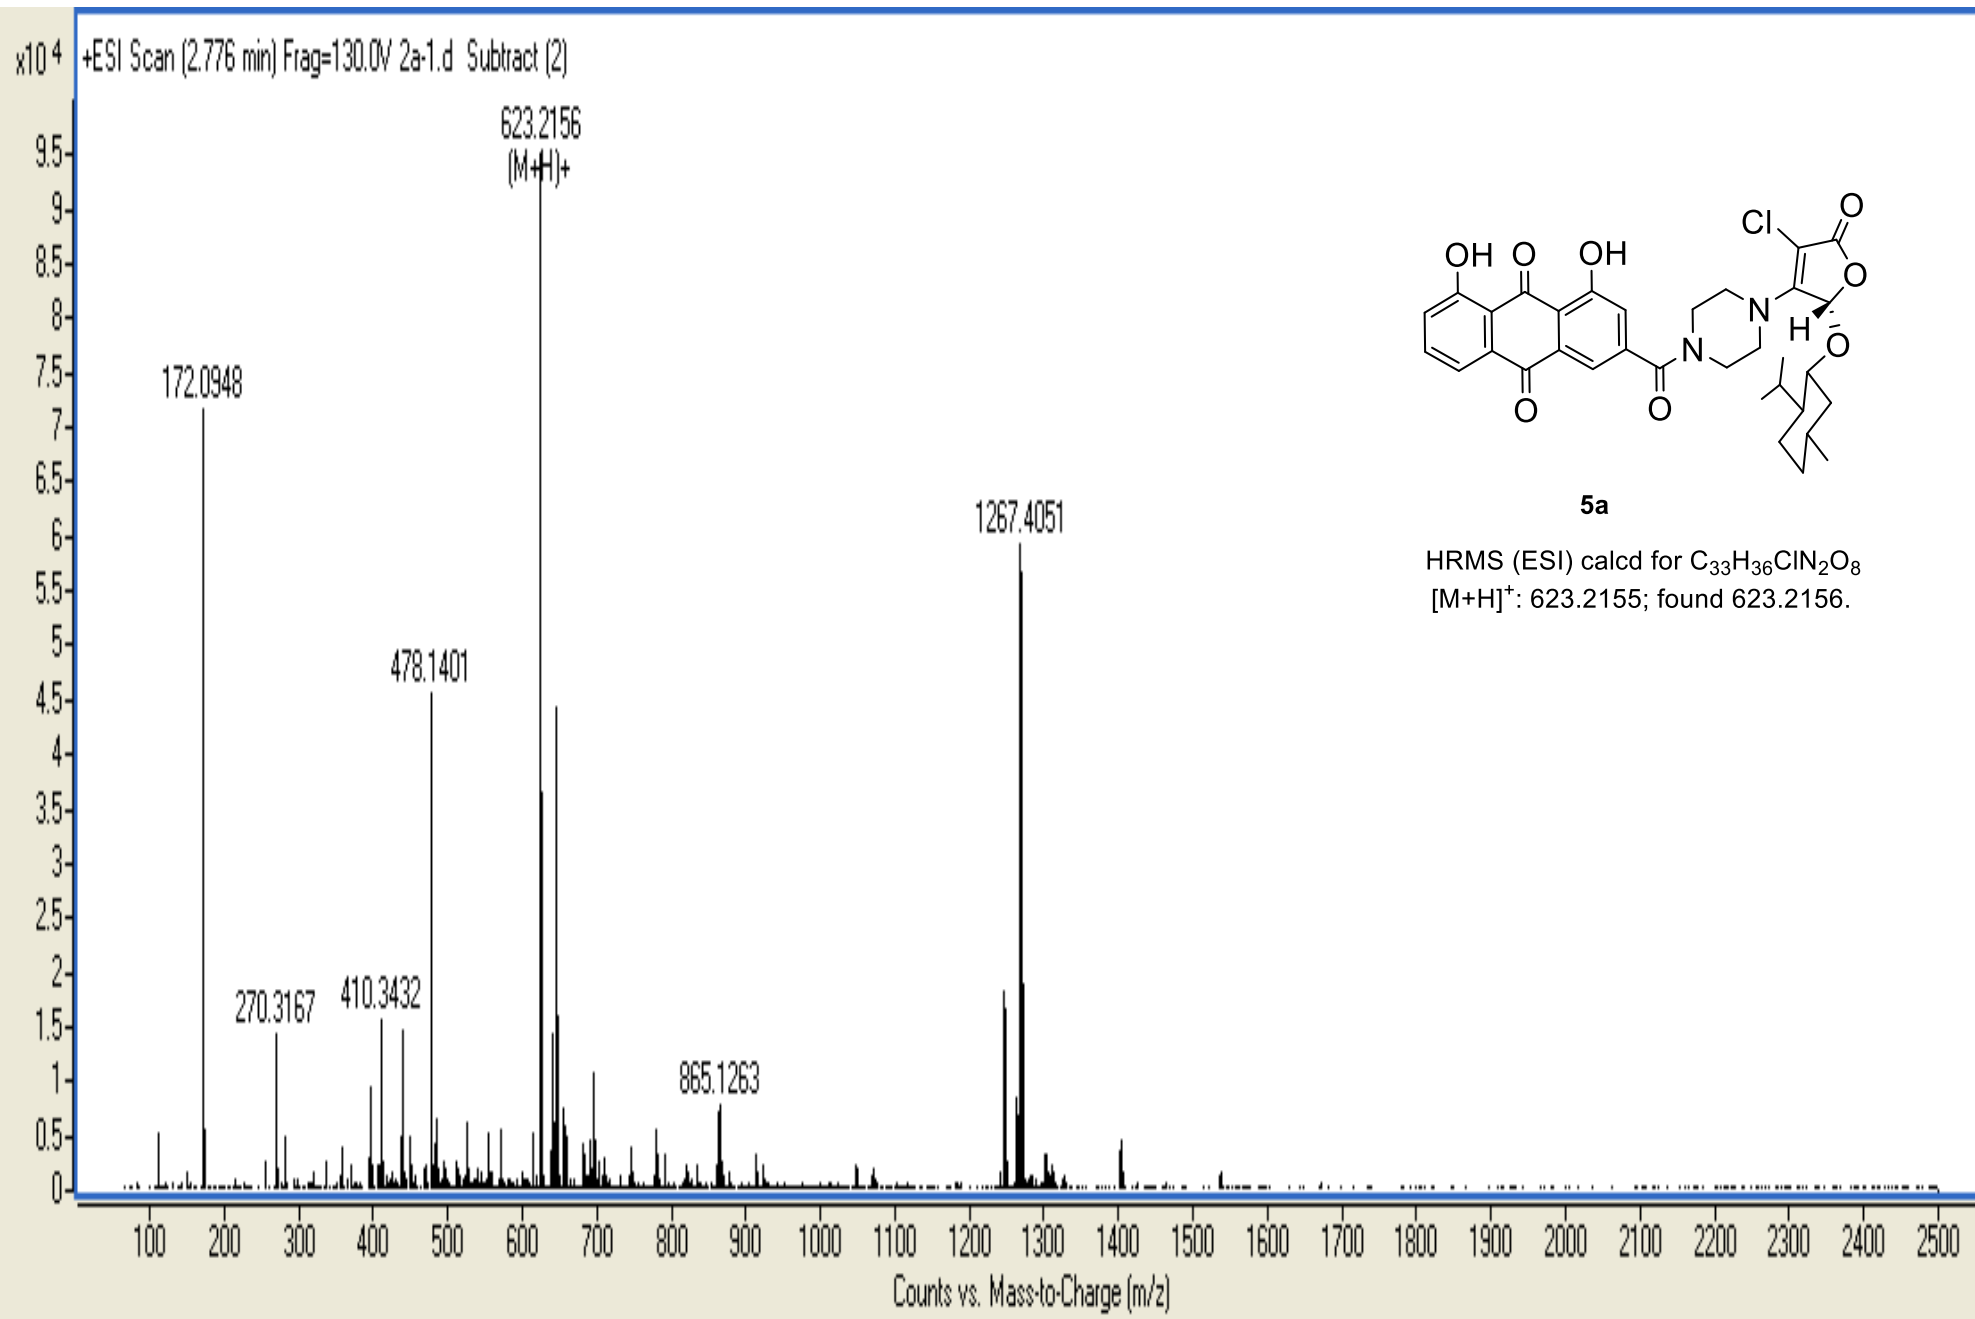

HRMS spectrum of **5a**

zss-324-H

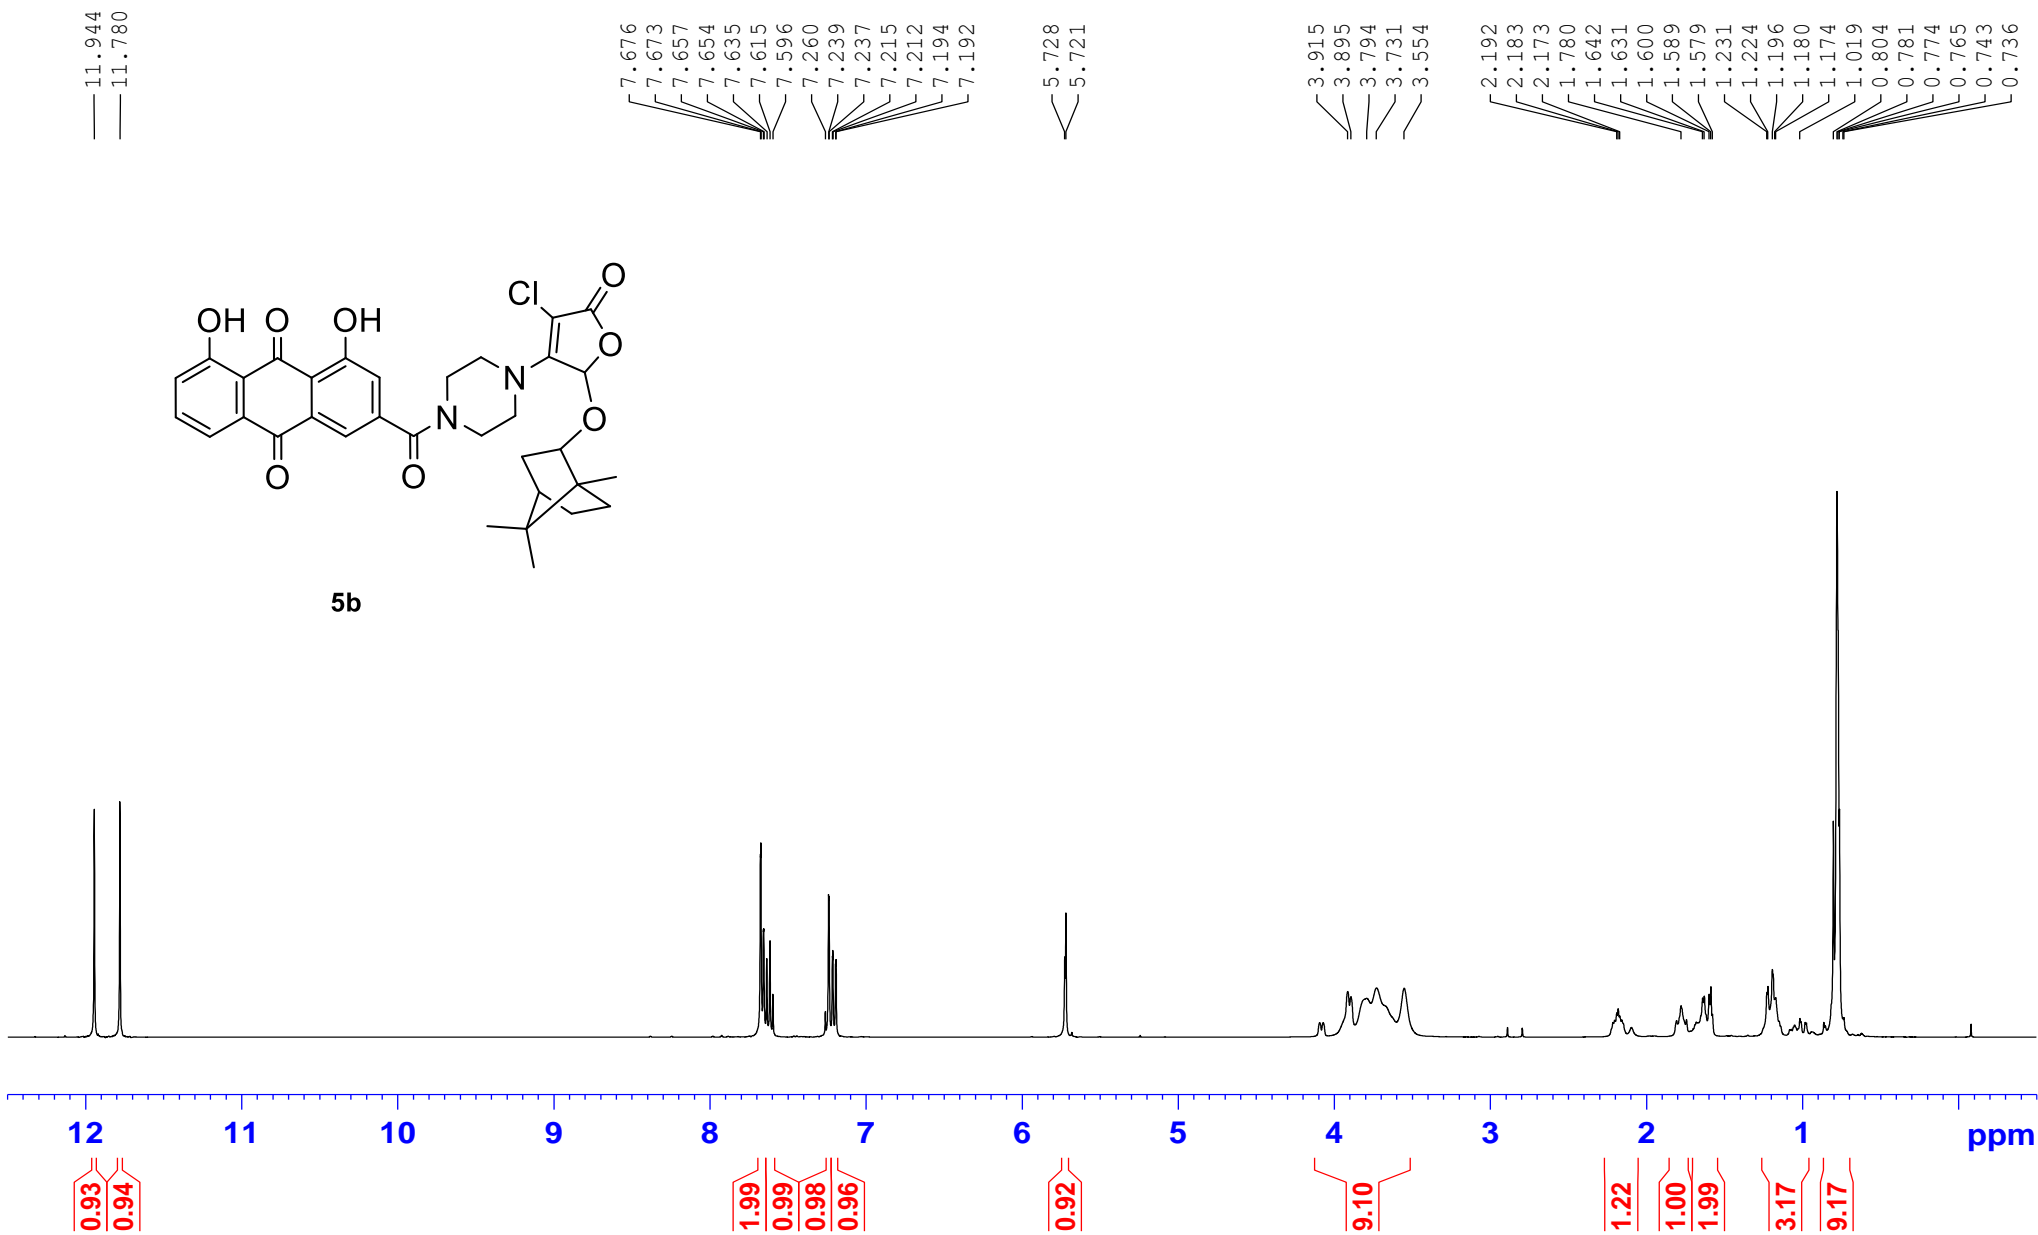

— 192.37  
 — 180.76  
 { 167.70  
 { 167.54  
 { 162.68  
 { 162.57  
 — 154.37  
 — 143.31  
 / 137.77  
 / 134.11  
 / 133.13  
 / 125.11  
 / 122.55  
 / 120.37  
 / 117.80  
 / 116.49  
 / 115.52  
 — 98.41  
 { 88.54  
 { 87.85  
 { 77.48  
 { 77.16  
 { 76.84  
 / 49.42  
 / 47.58  
 / 47.32  
 / 44.81  
 / 42.11  
 / 37.27  
 / 28.01  
 / 26.64  
 / 19.61  
 / 18.80  
 / 14.27

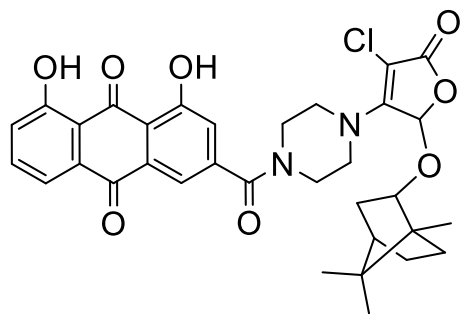

5b

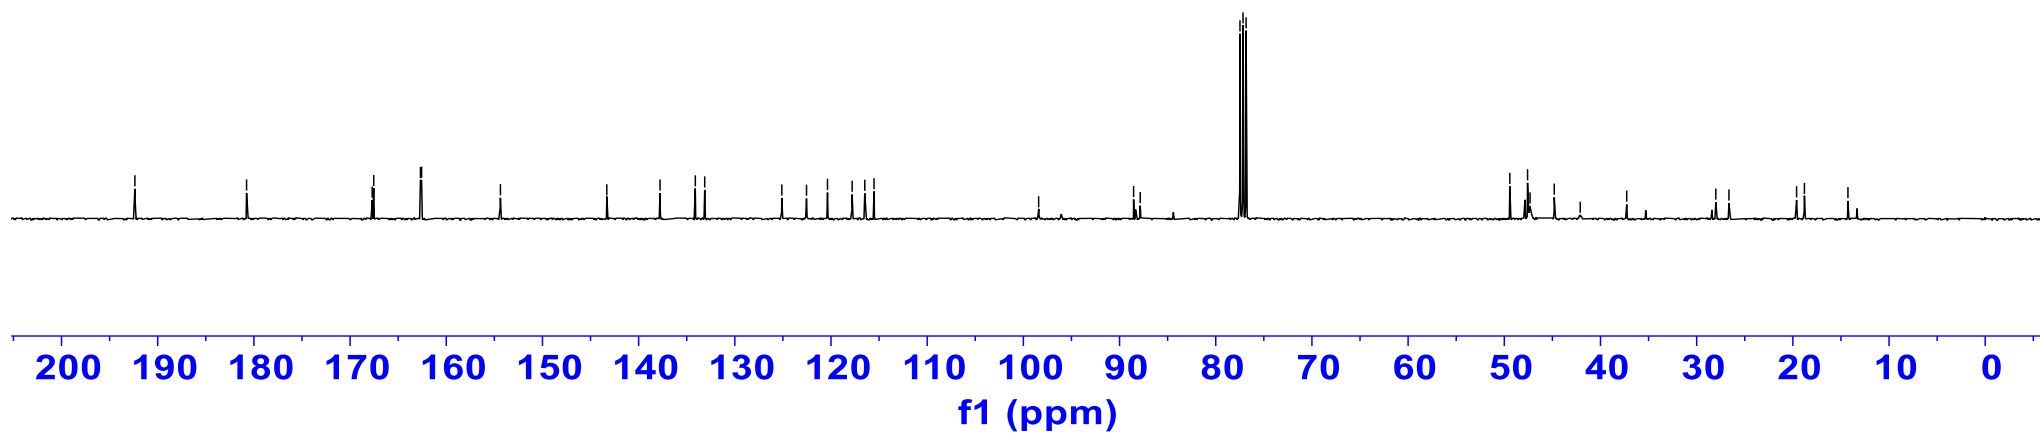

<sup>13</sup>C NMR (101 MHz, CDCl<sub>3</sub>) spectrum of **5b**

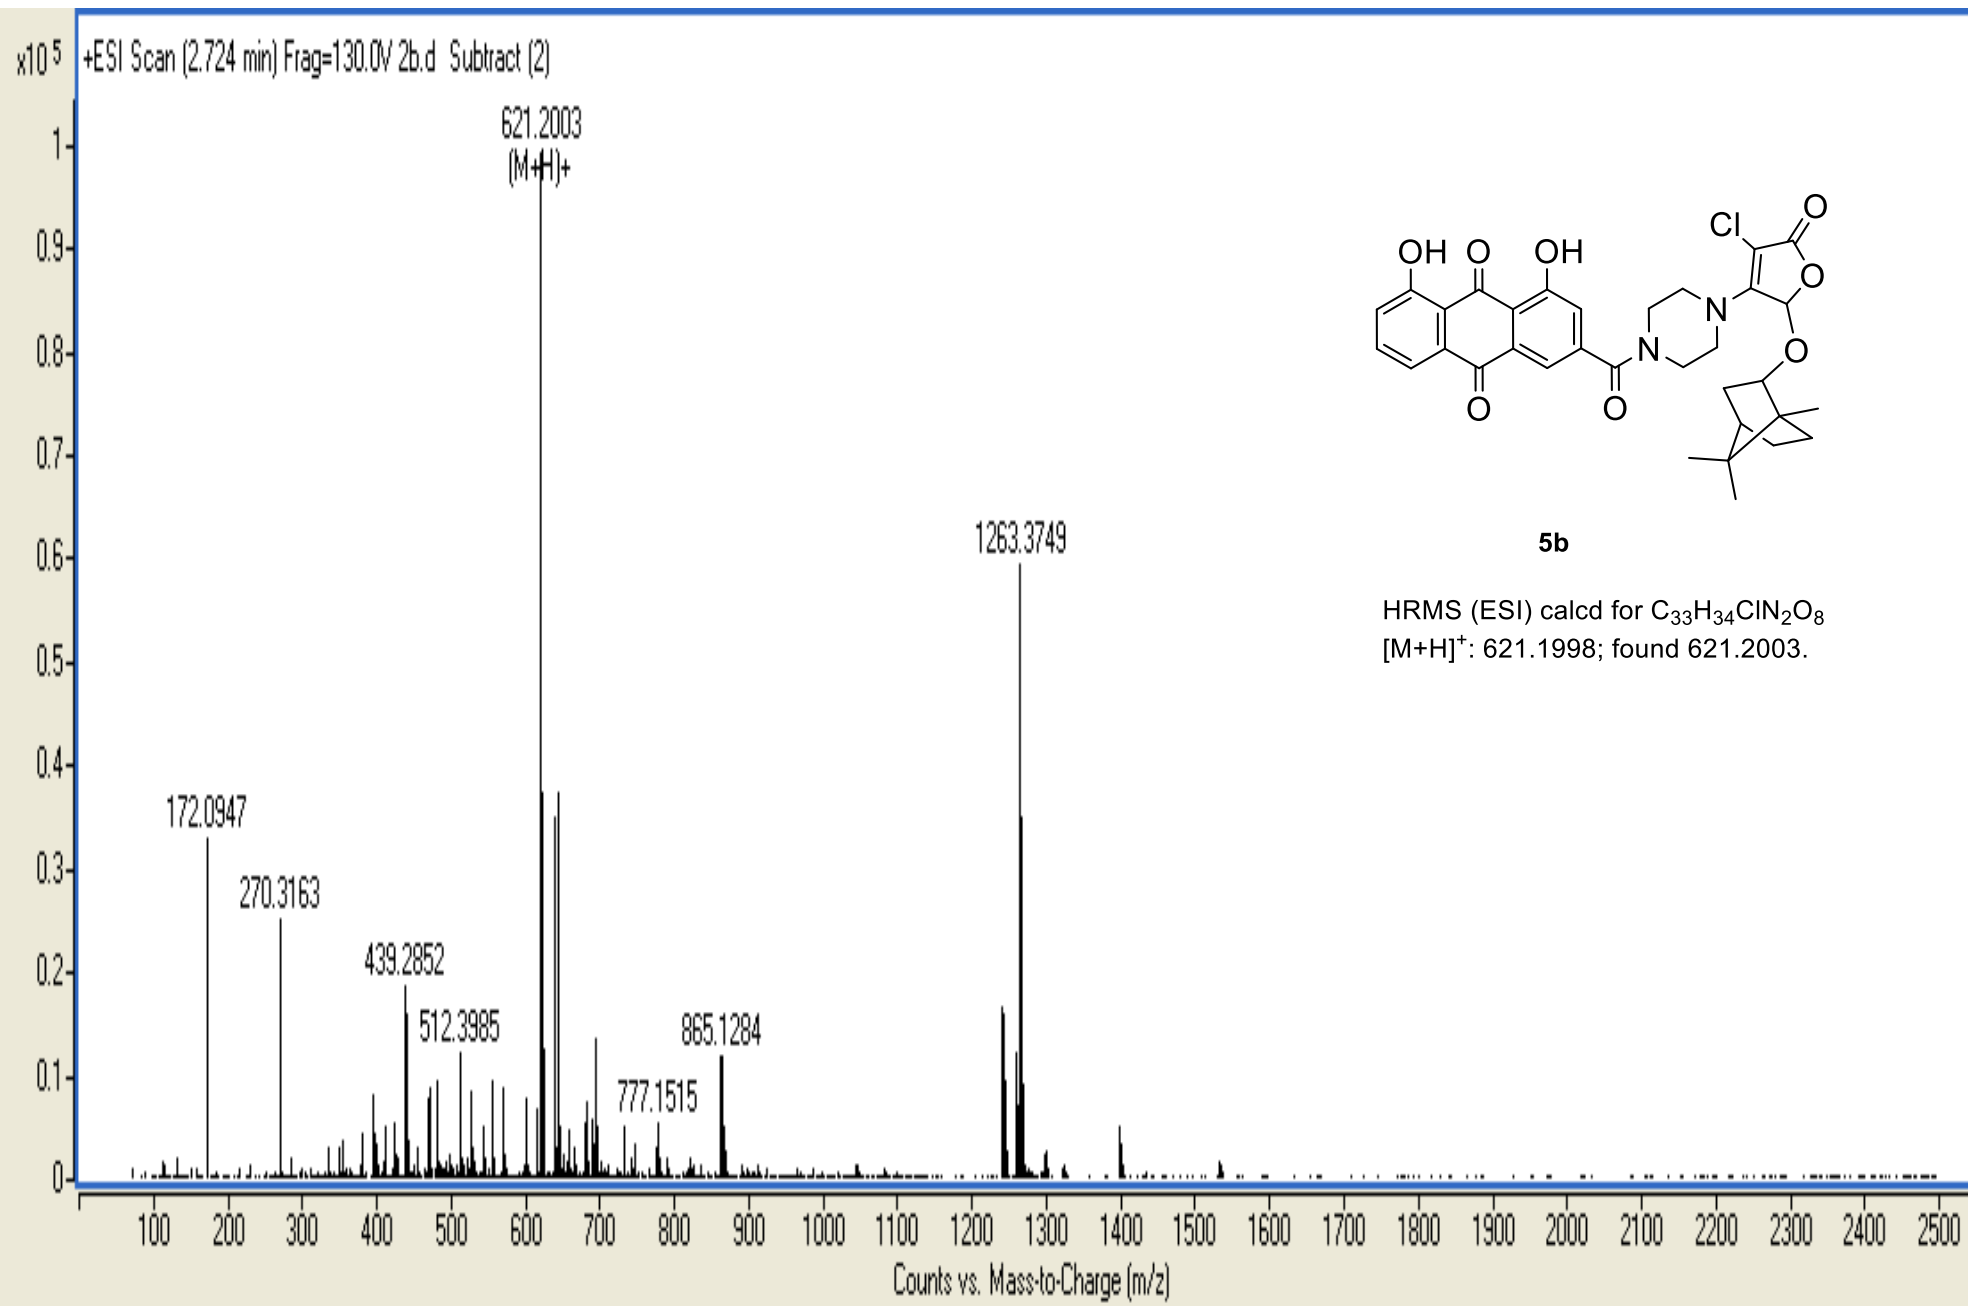

HRMS spectrum of **5b**

zss-325-H

12.035  
11.873

7.766  
7.763  
7.751  
7.719  
7.699  
7.680  
7.322  
7.319  
7.304  
7.302  
7.284  
7.282

5.892

3.883  
3.810  
3.722  
3.633  
3.623  
3.608  
3.597  
3.582  
3.571  
2.229  
2.198  
2.140  
2.123  
2.106  
1.685  
1.676  
1.662  
1.652  
1.357  
1.329  
1.144  
1.116  
0.999  
0.991  
0.948  
0.932  
0.917  
0.890  
0.885  
0.866  
0.835  
0.828  
0.795  
0.780  
0.763

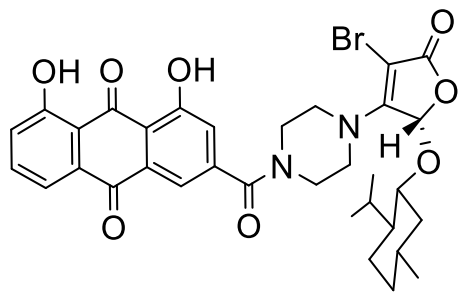

5c

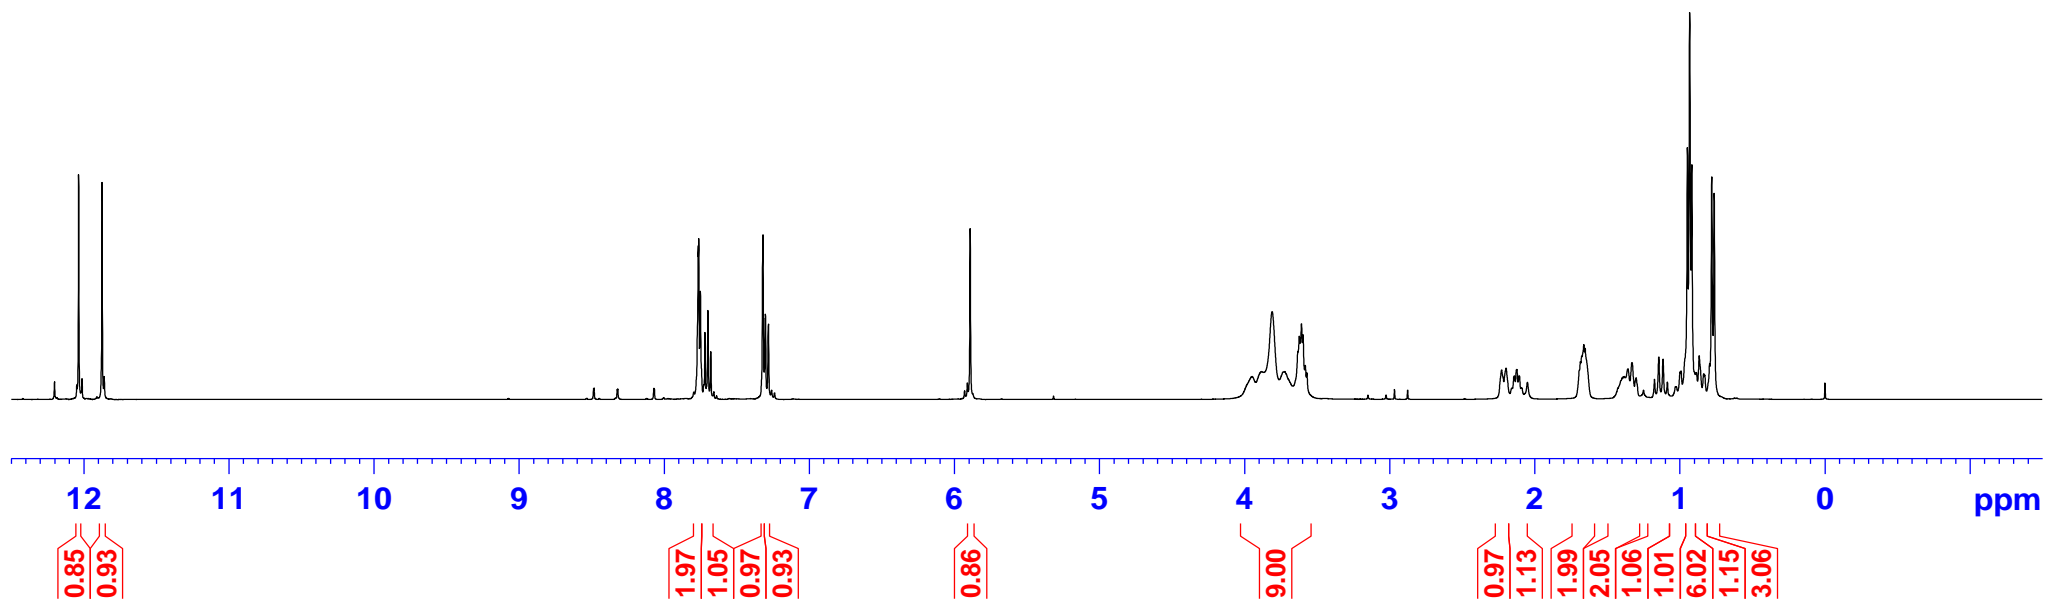

<sup>1</sup>H NMR (400 MHz, CDCl<sub>3</sub>) spectrum of 5c



zss-325-C

192.23  
180.61  
168.12  
167.38  
162.58  
162.45  
157.59  
143.23  
137.71  
133.96  
133.01  
125.03  
122.51  
120.27  
117.76  
116.37  
115.41  
98.12  
81.03  
77.48  
77.16  
76.84  
75.60  
48.01  
47.52  
42.31  
41.80  
33.77  
31.56  
25.15  
22.61  
22.21  
21.12  
15.71

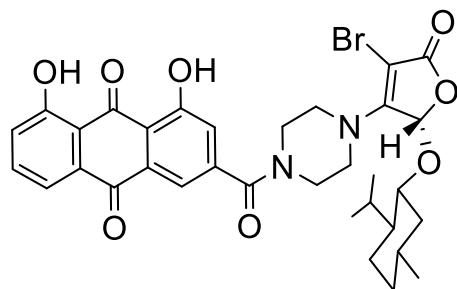

5c

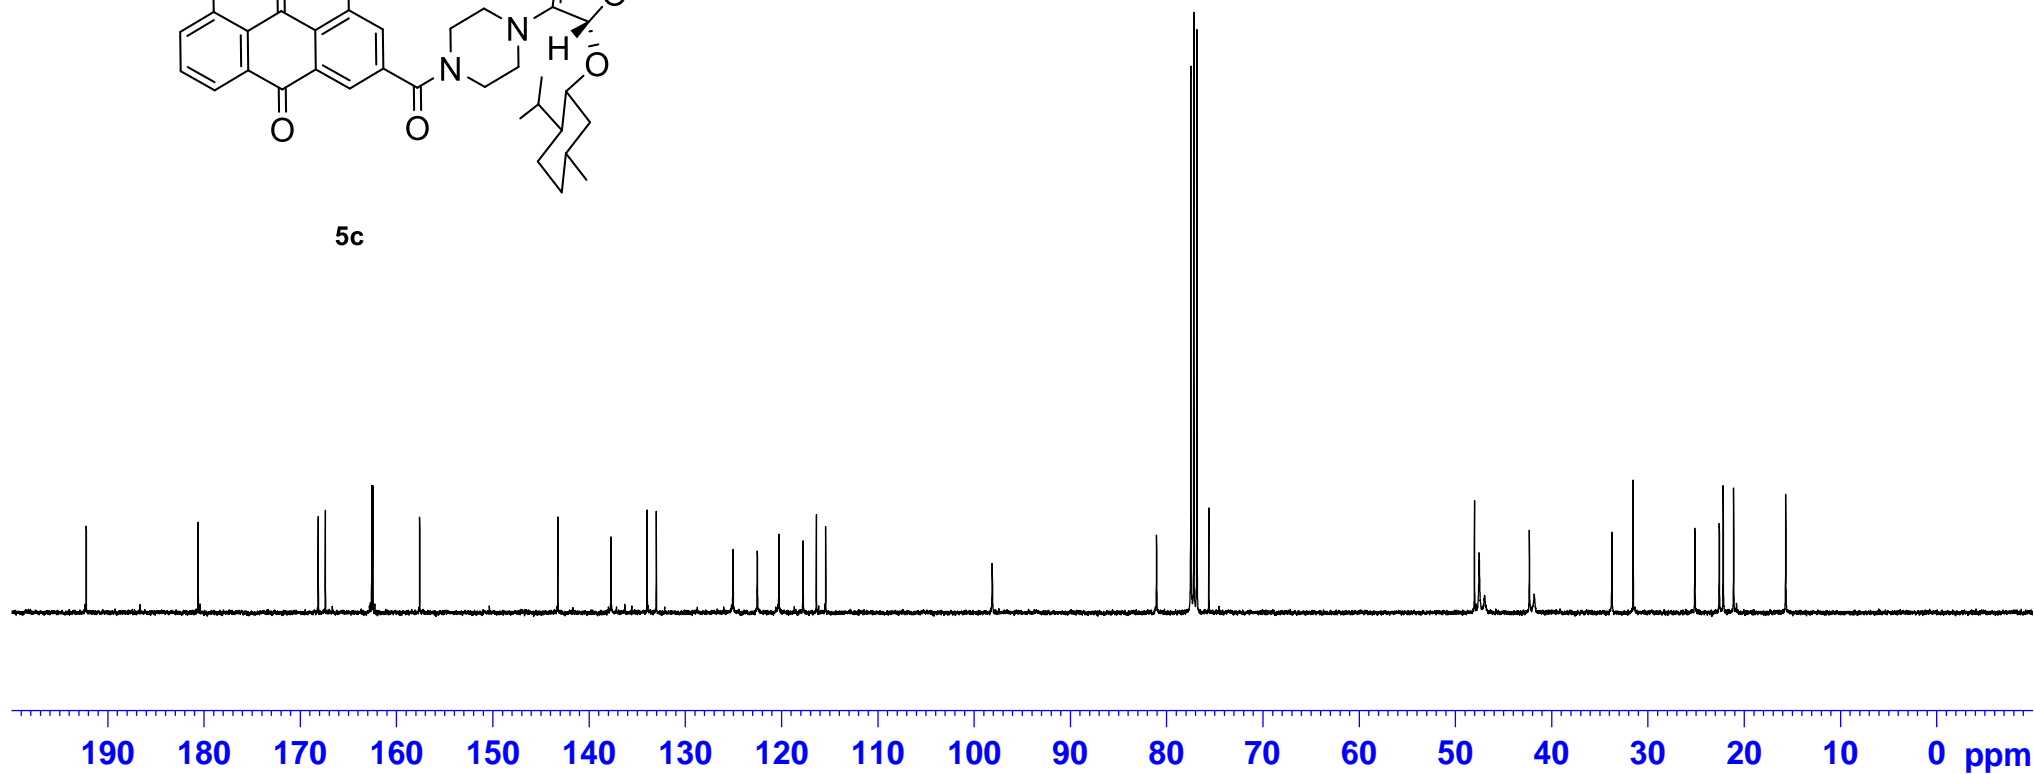

$^{13}\text{C}$  NMR (101 MHz,  $\text{CDCl}_3$ ) spectrum of 5c

x10<sup>5</sup> +ESI Scan (2.885 min) Frag=130.0V 2c.d Subtract (2)

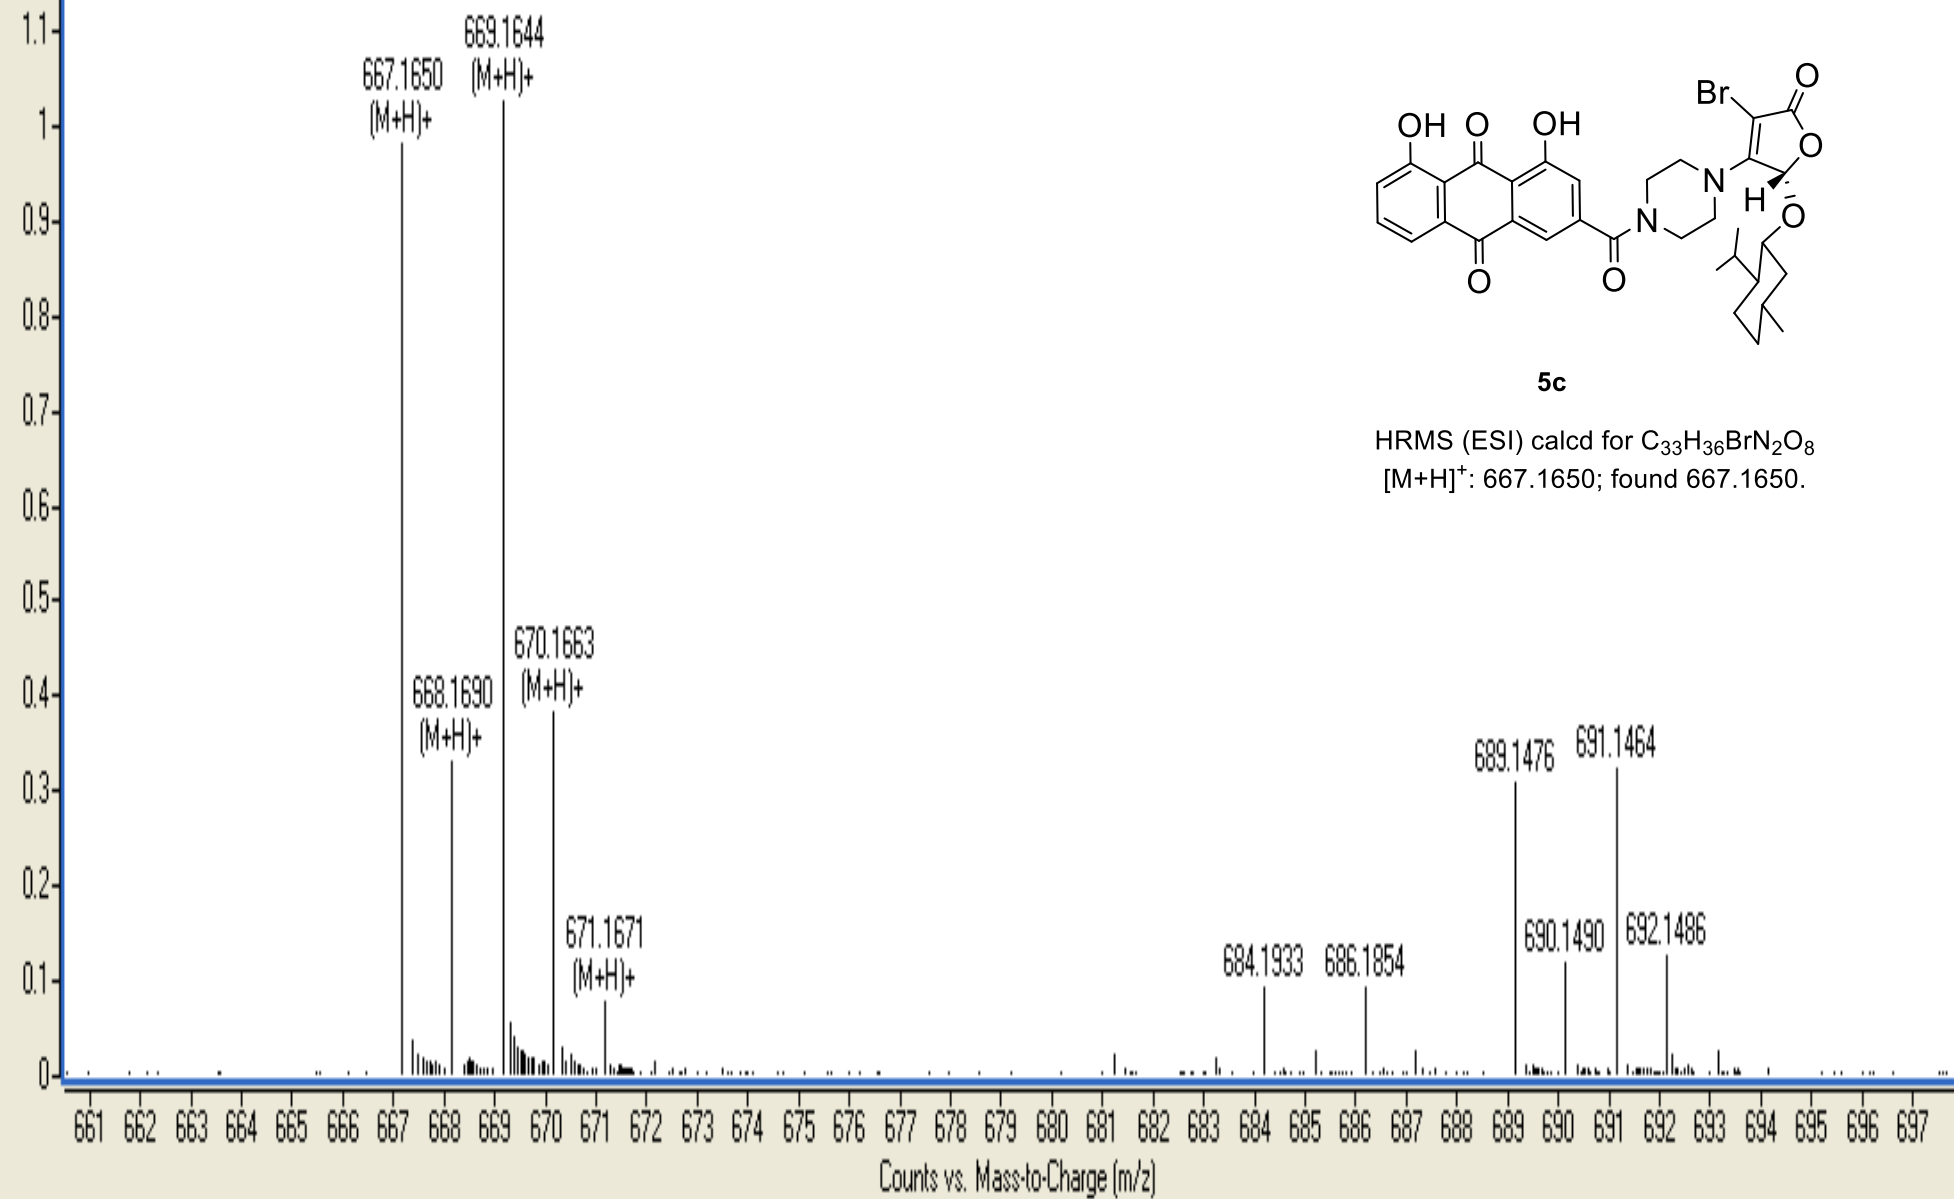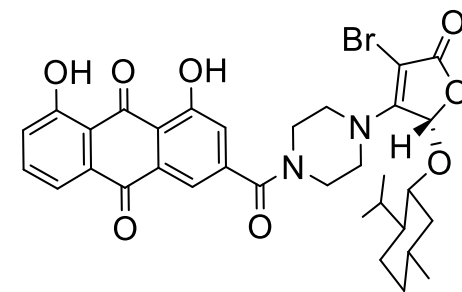

**5c**

HRMS (ESI) calcd for C<sub>33</sub>H<sub>36</sub>BrN<sub>2</sub>O<sub>8</sub>  
[M+H]<sup>+</sup>: 667.1650; found 667.1650.

HRMS spectrum of **5c**

zss-322-H

12.100  
11.931

7.837  
7.834  
7.818  
7.815  
7.794  
7.790  
7.738  
7.717  
7.698  
7.338  
7.336  
7.322  
7.318  
7.260

5.770  
5.753

3.963  
3.943  
3.862  
3.773  
3.576

1.713  
1.703  
1.668  
1.657  
1.302  
1.294  
1.267  
1.260  
1.251  
1.246  
1.236  
0.928  
0.870  
0.852  
0.840  
0.827  
0.802

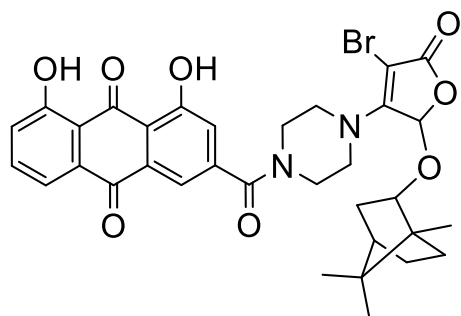

5d

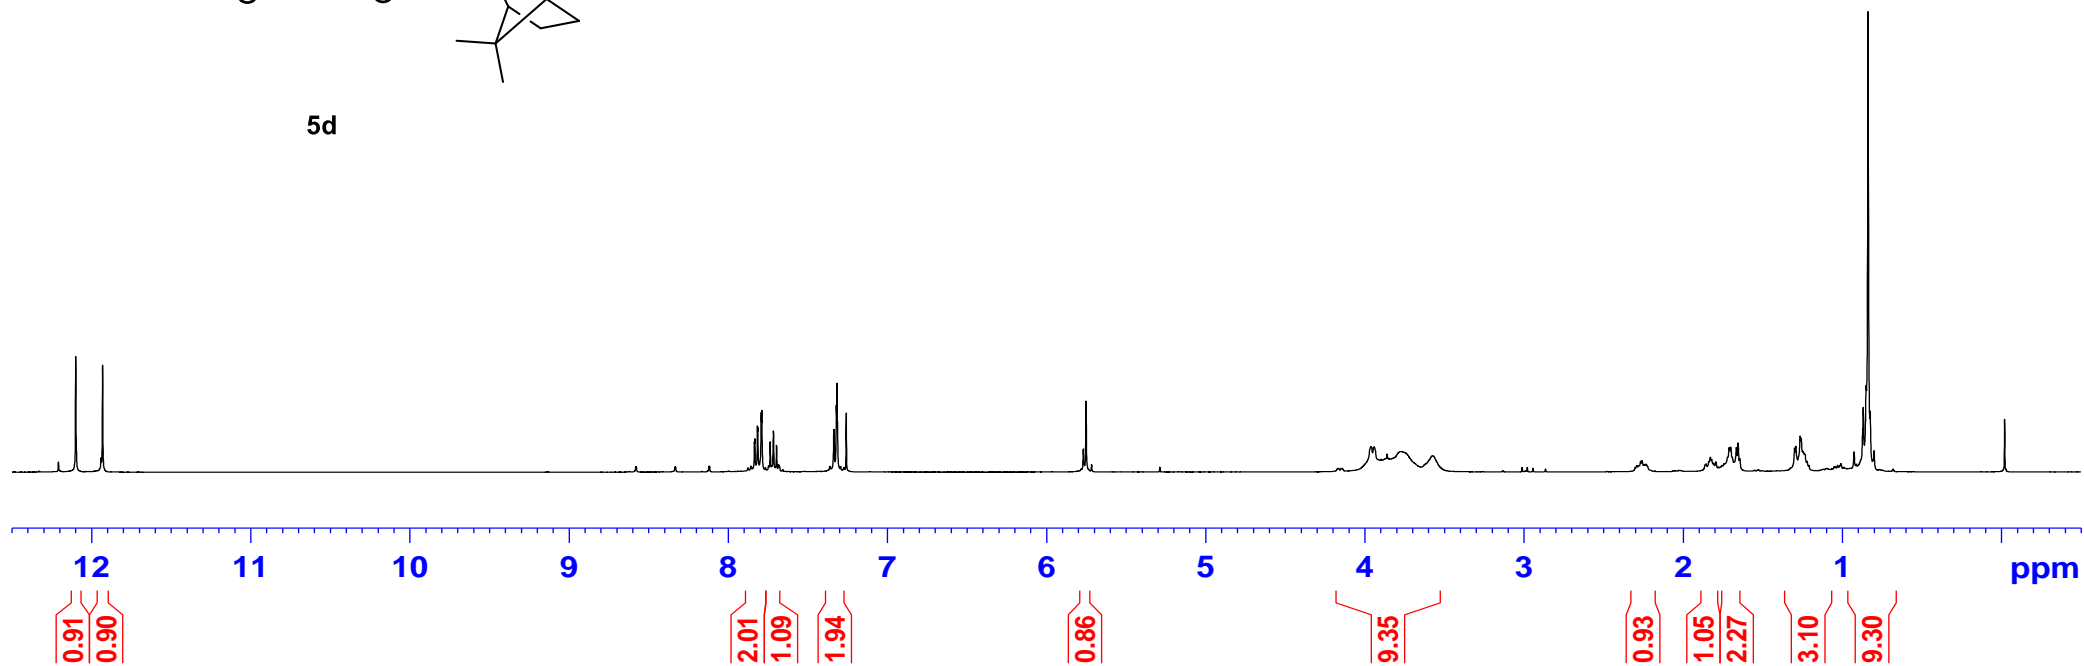

<sup>1</sup>H NMR (400 MHz, CDCl<sub>3</sub>) spectrum of 5d

— 191.87  
 — 180.23  
 { 167.91  
 { 167.15  
 { 162.25  
 { 162.14  
 { 156.94  
 — 143.18  
 { 137.52  
 { 133.62  
 — 132.69  
 { 124.77  
 { 122.30  
 { 119.98  
 { 117.63  
 { 116.02  
 { 115.09  
 — 99.14  
 — 87.27  
 { 77.48  
 { 77.16  
 { 76.84  
 { 74.48  
 { 49.14  
 { 47.28  
 { 46.89  
 { 44.55  
 { 41.85  
 { 36.98  
 { 27.79  
 { 26.38  
 { 19.38  
 { 18.57  
 { 13.98

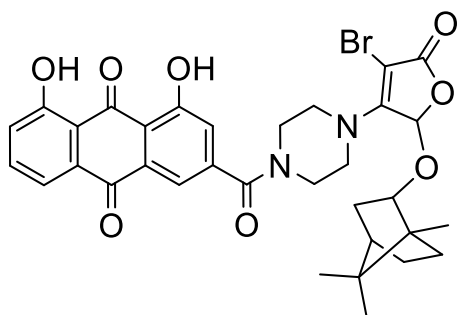

5d

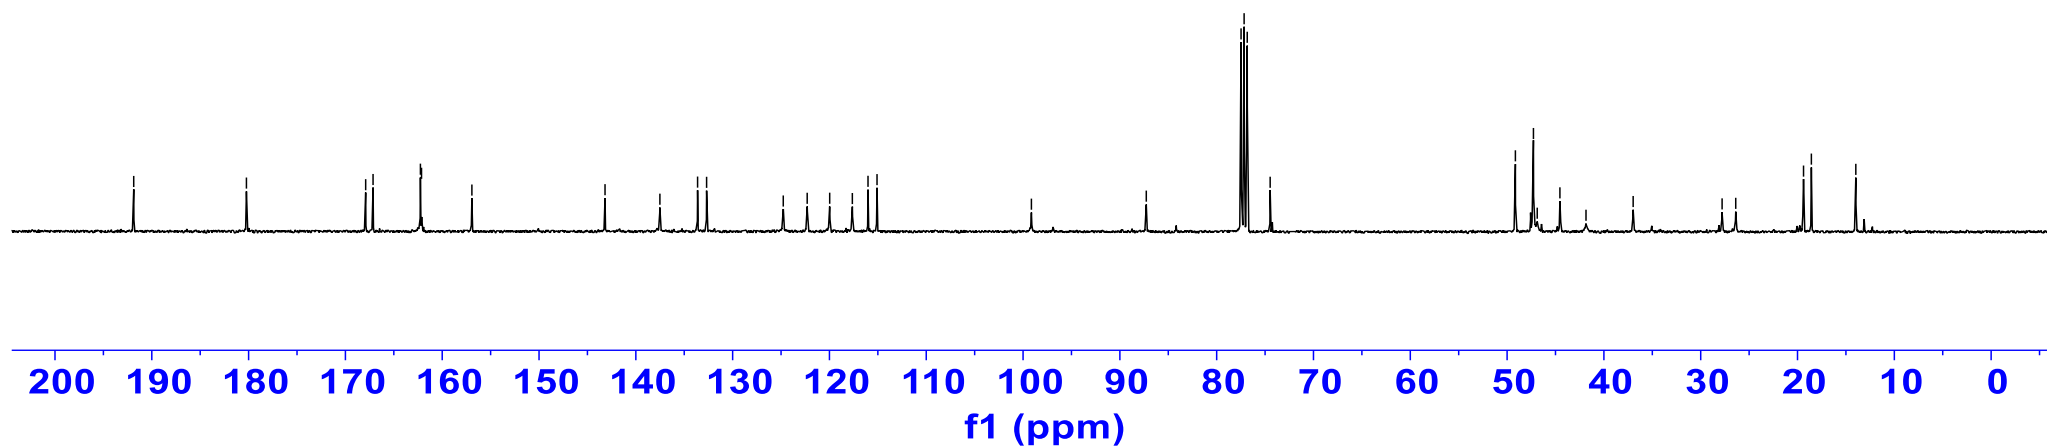

<sup>13</sup>C NMR (101 MHz, CDCl<sub>3</sub>) spectrum of **5d**

x10<sup>4</sup> +ESI Scan (2.744 min) Frag=130.0V 2d.d Subtract (3)

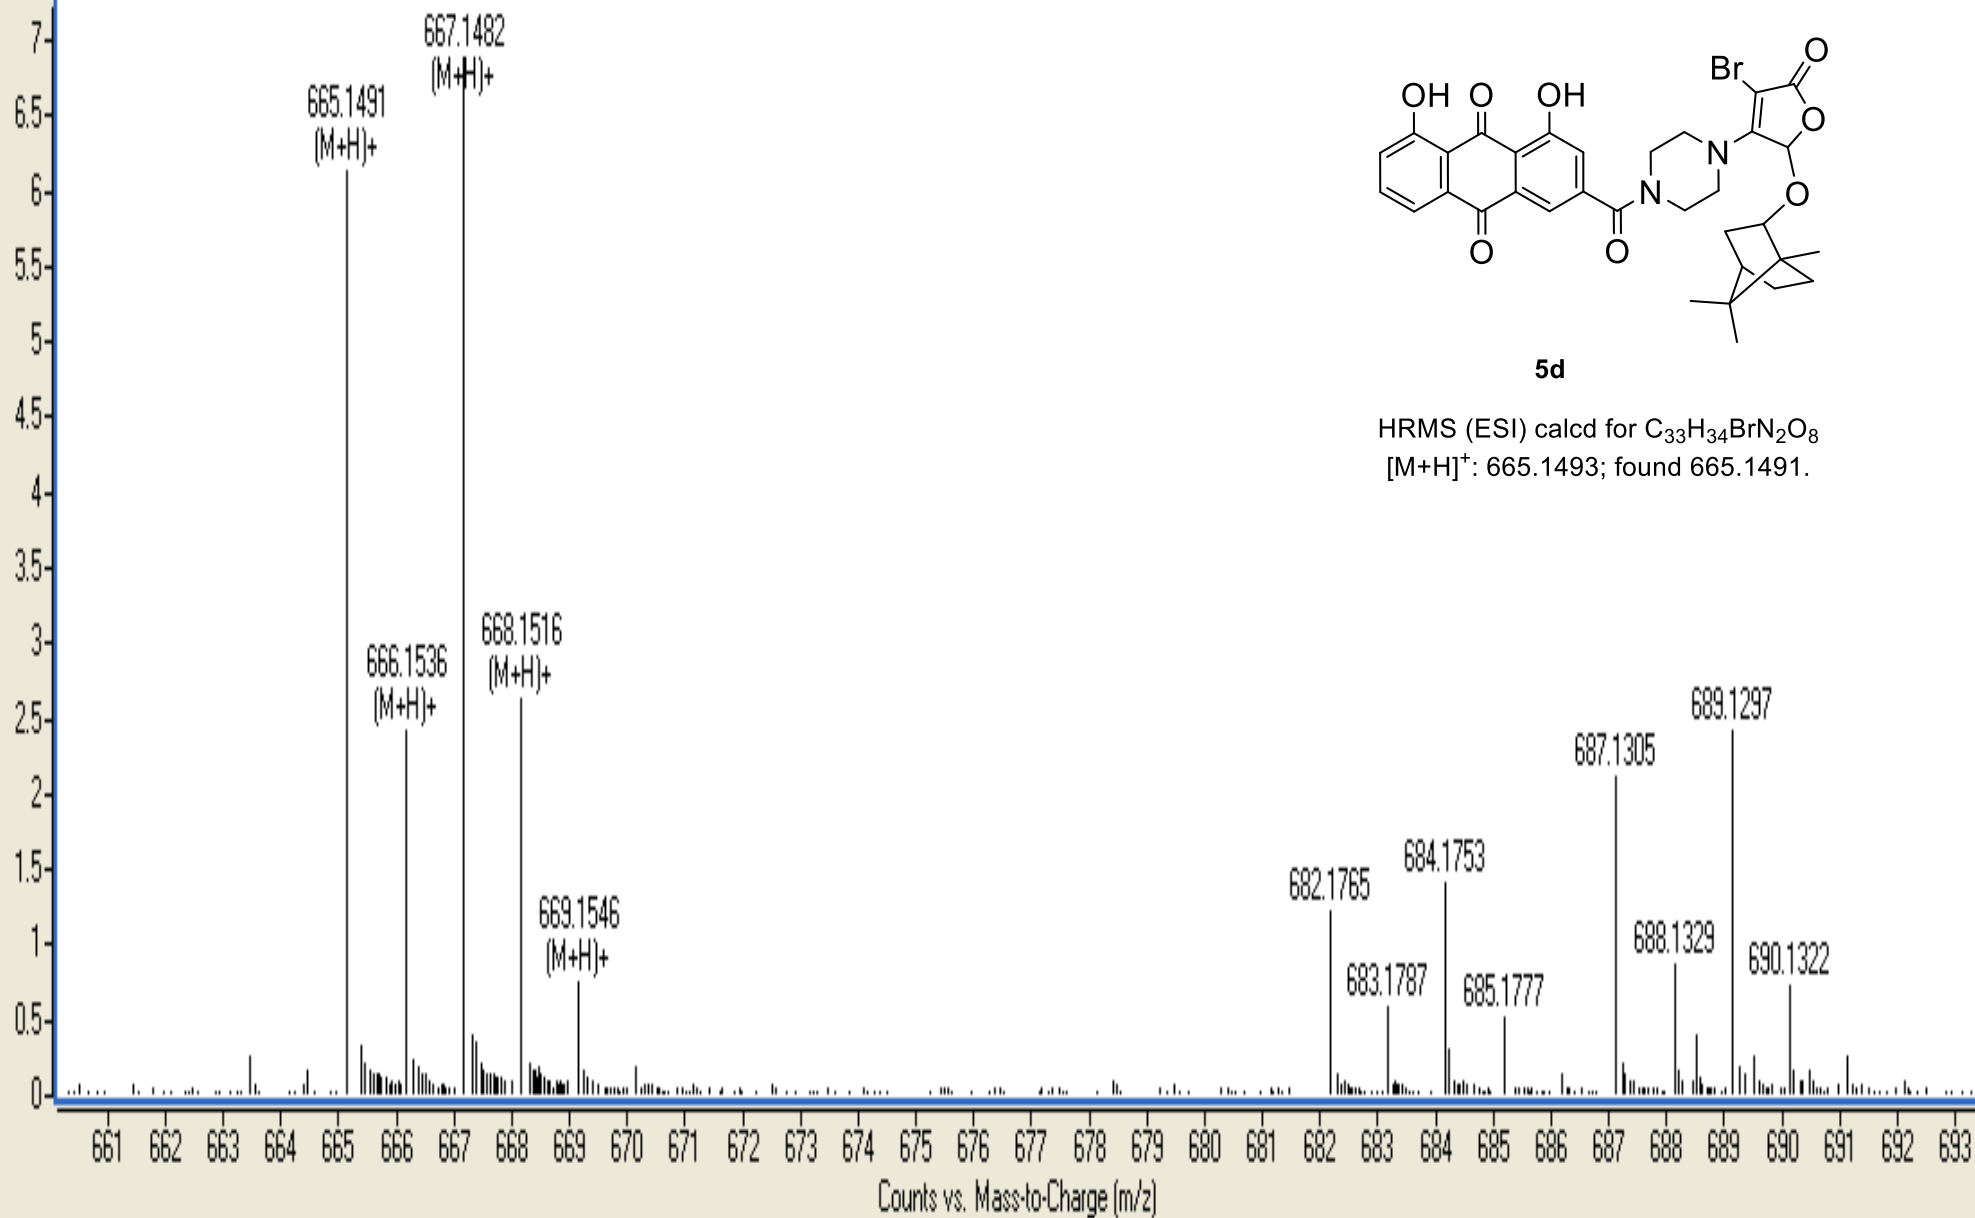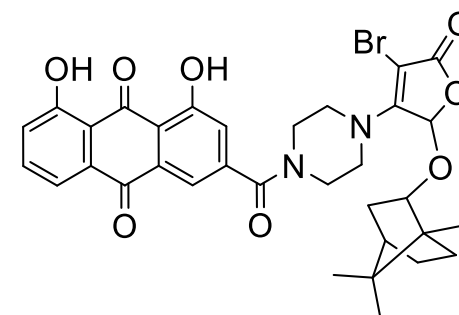

**5d**

HRMS (ESI) calcd for C<sub>33</sub>H<sub>34</sub>BrN<sub>2</sub>O<sub>8</sub>  
[M+H]<sup>+</sup>: 665.1493; found 665.1491.

HRMS spectrum of **5d**

zss-318-H

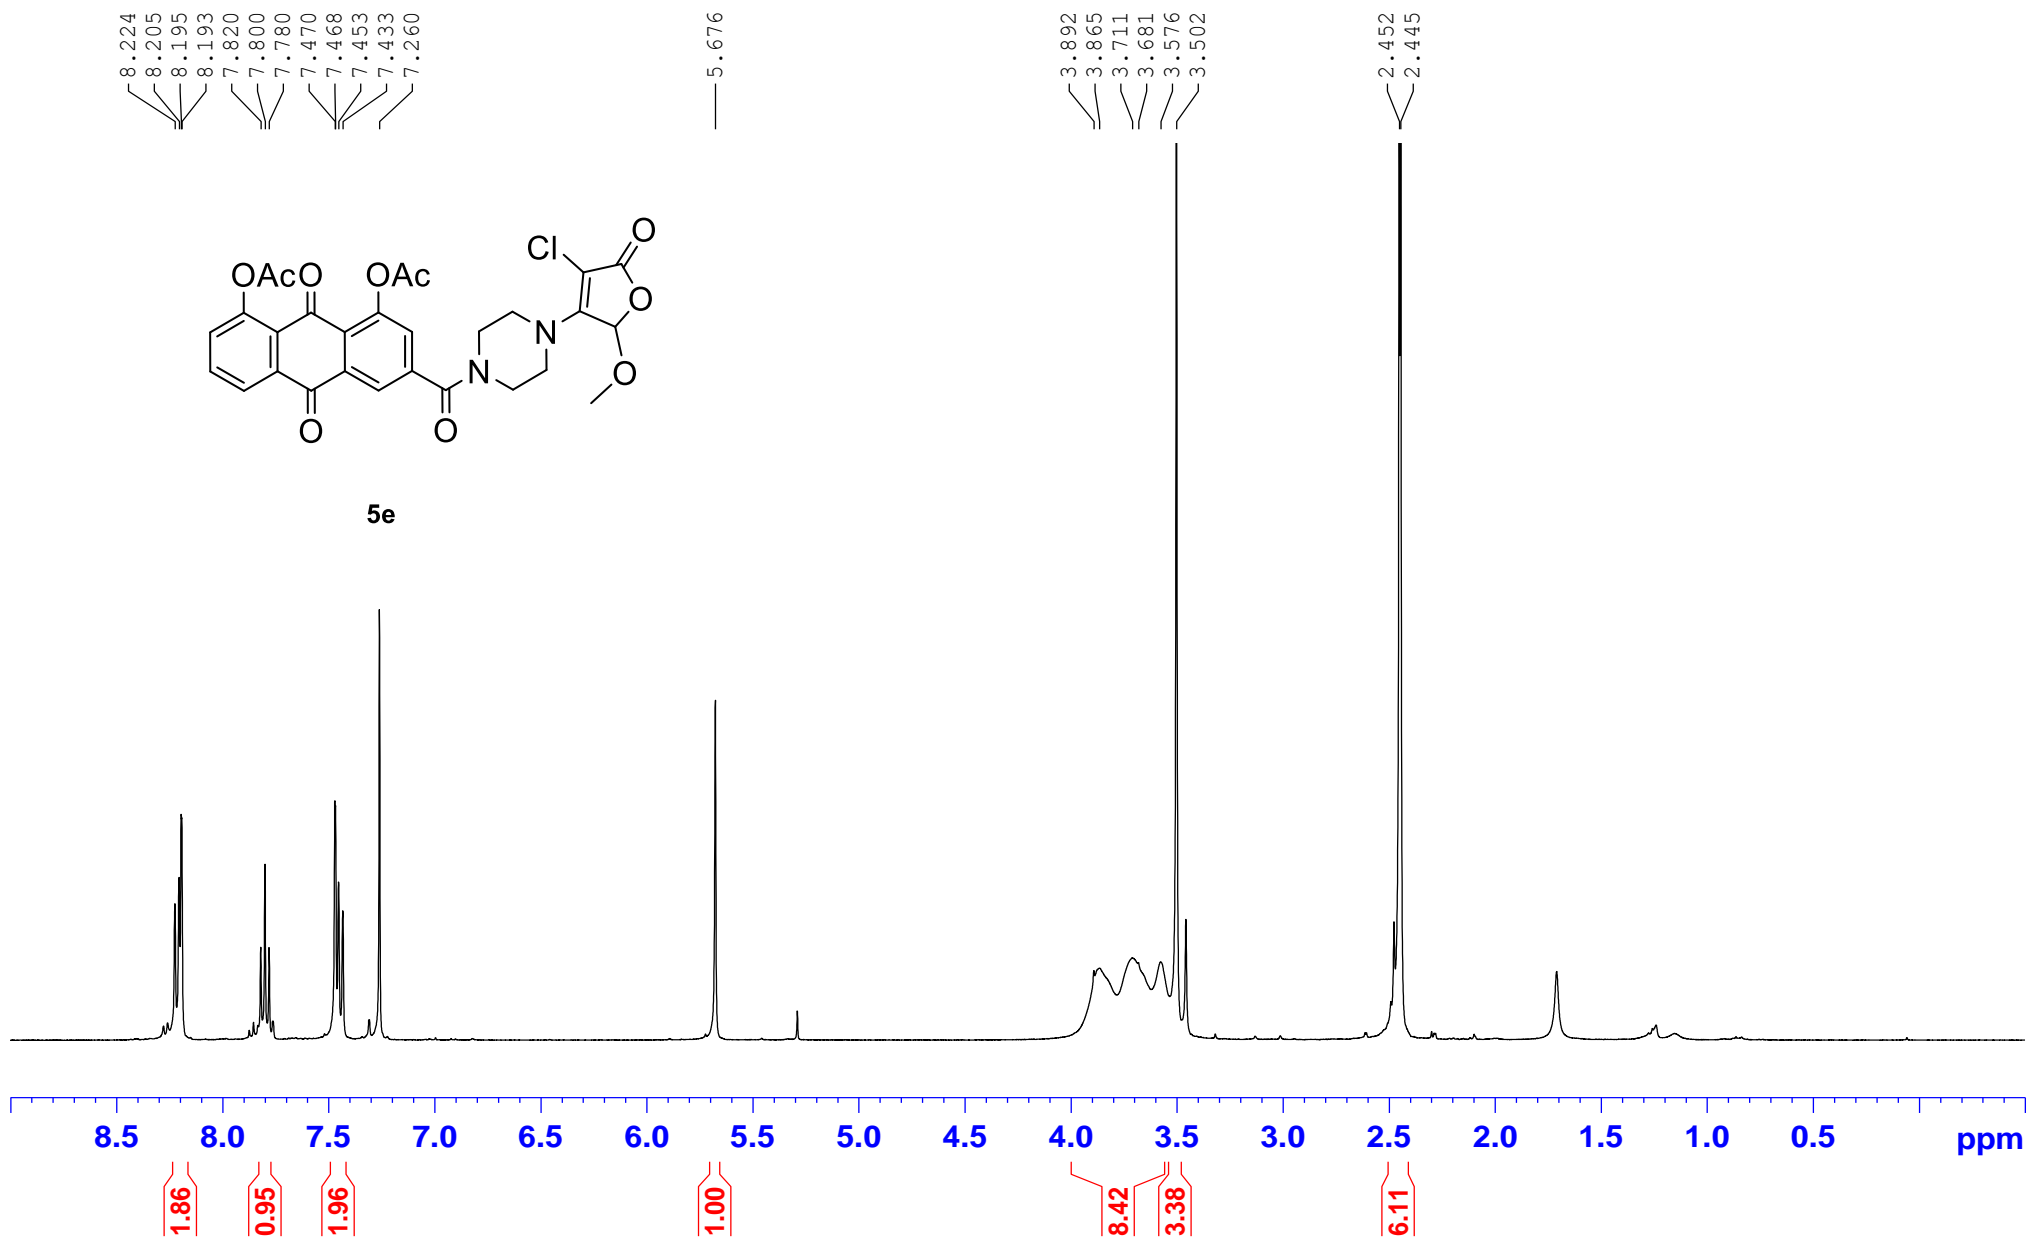

<sup>1</sup>H NMR (400 MHz, CDCl<sub>3</sub>) spectrum of **5e**

zss-318-C

181.29  
180.22

169.52  
169.36  
167.63  
167.18

153.63  
150.61  
150.26

140.71  
135.22  
134.79  
134.22  
130.82  
129.06  
126.57  
125.75  
125.57  
123.66

97.59

88.66

77.48  
77.16  
76.84

55.45

47.54

42.24

21.19

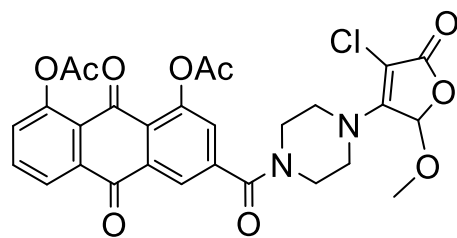

5e

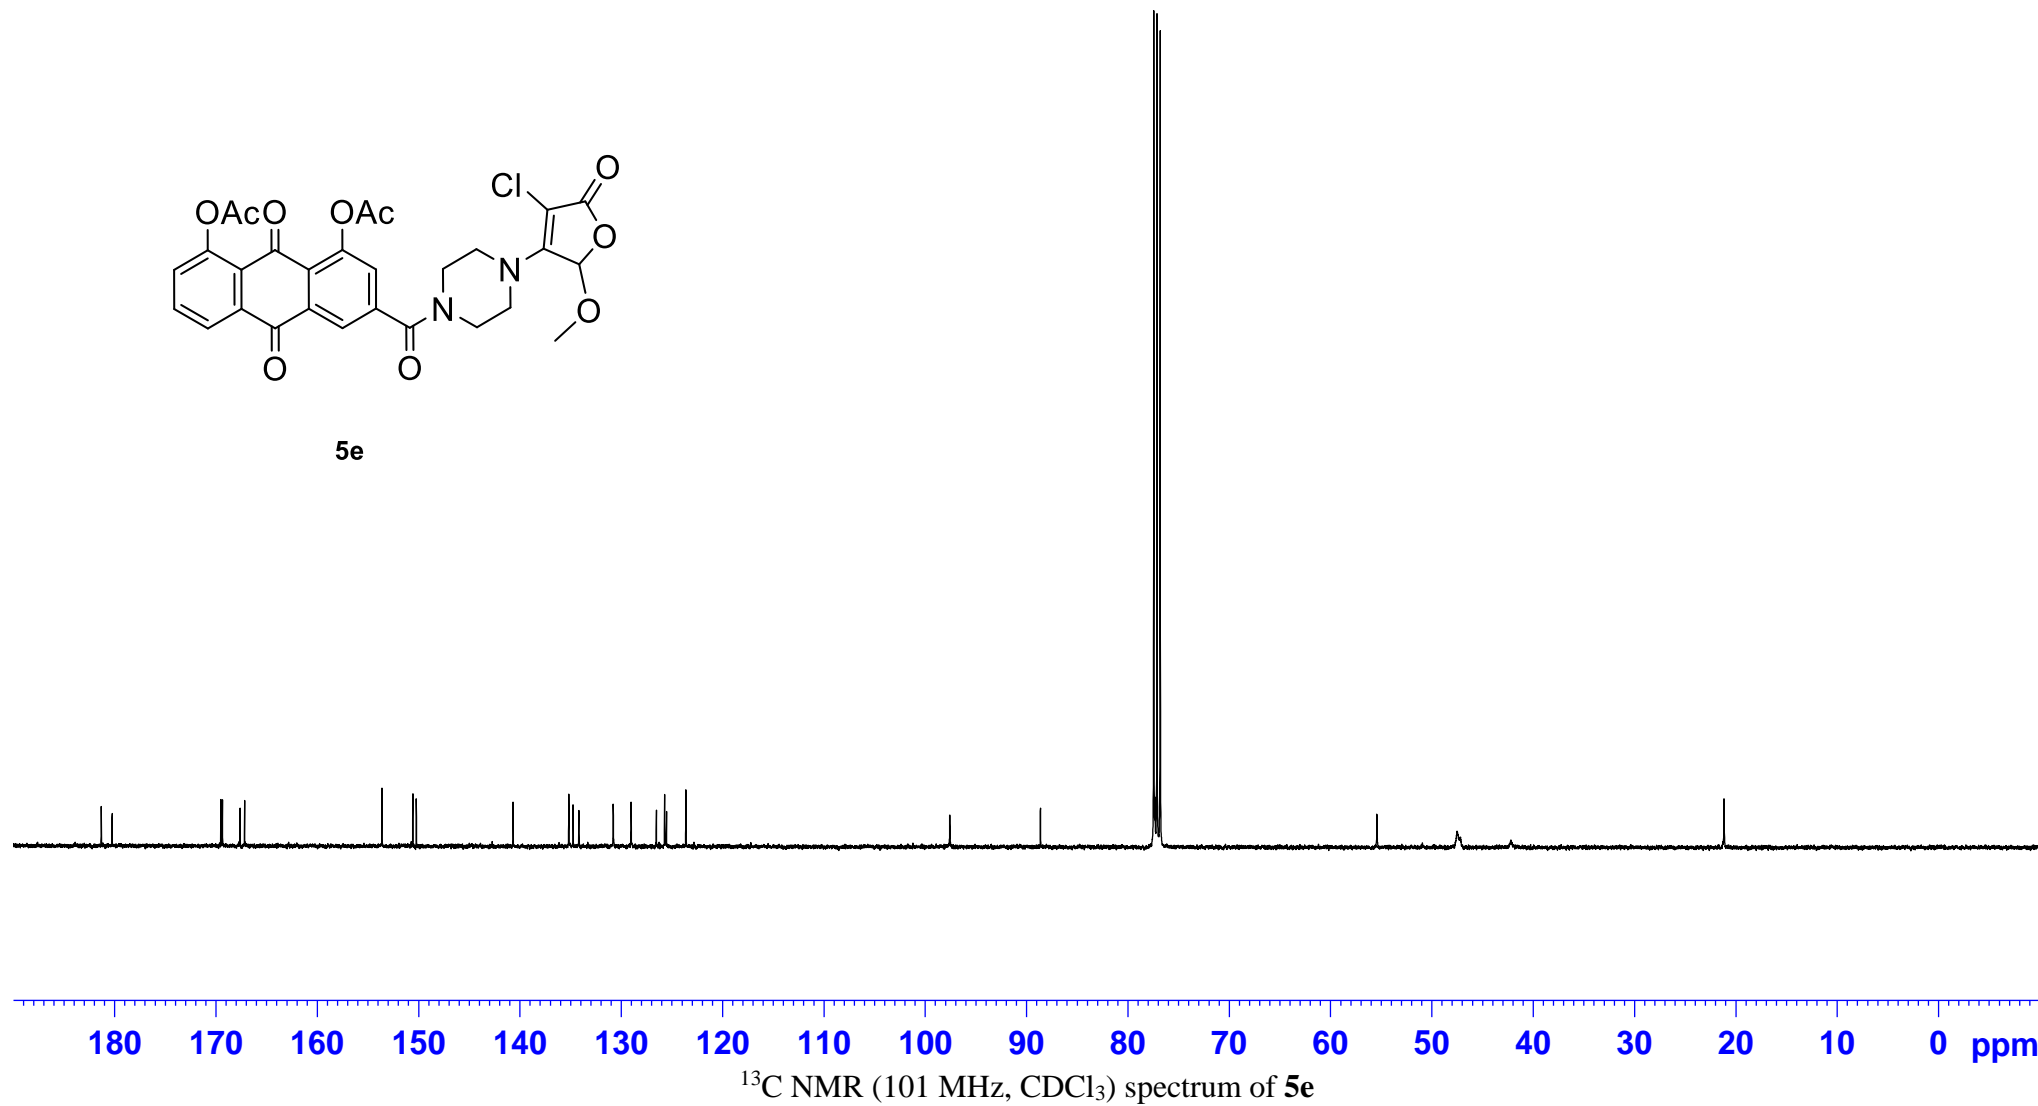

x10<sup>5</sup> +ESI Scan (0.765 min) Frag=130.0V 2e.d Subtract

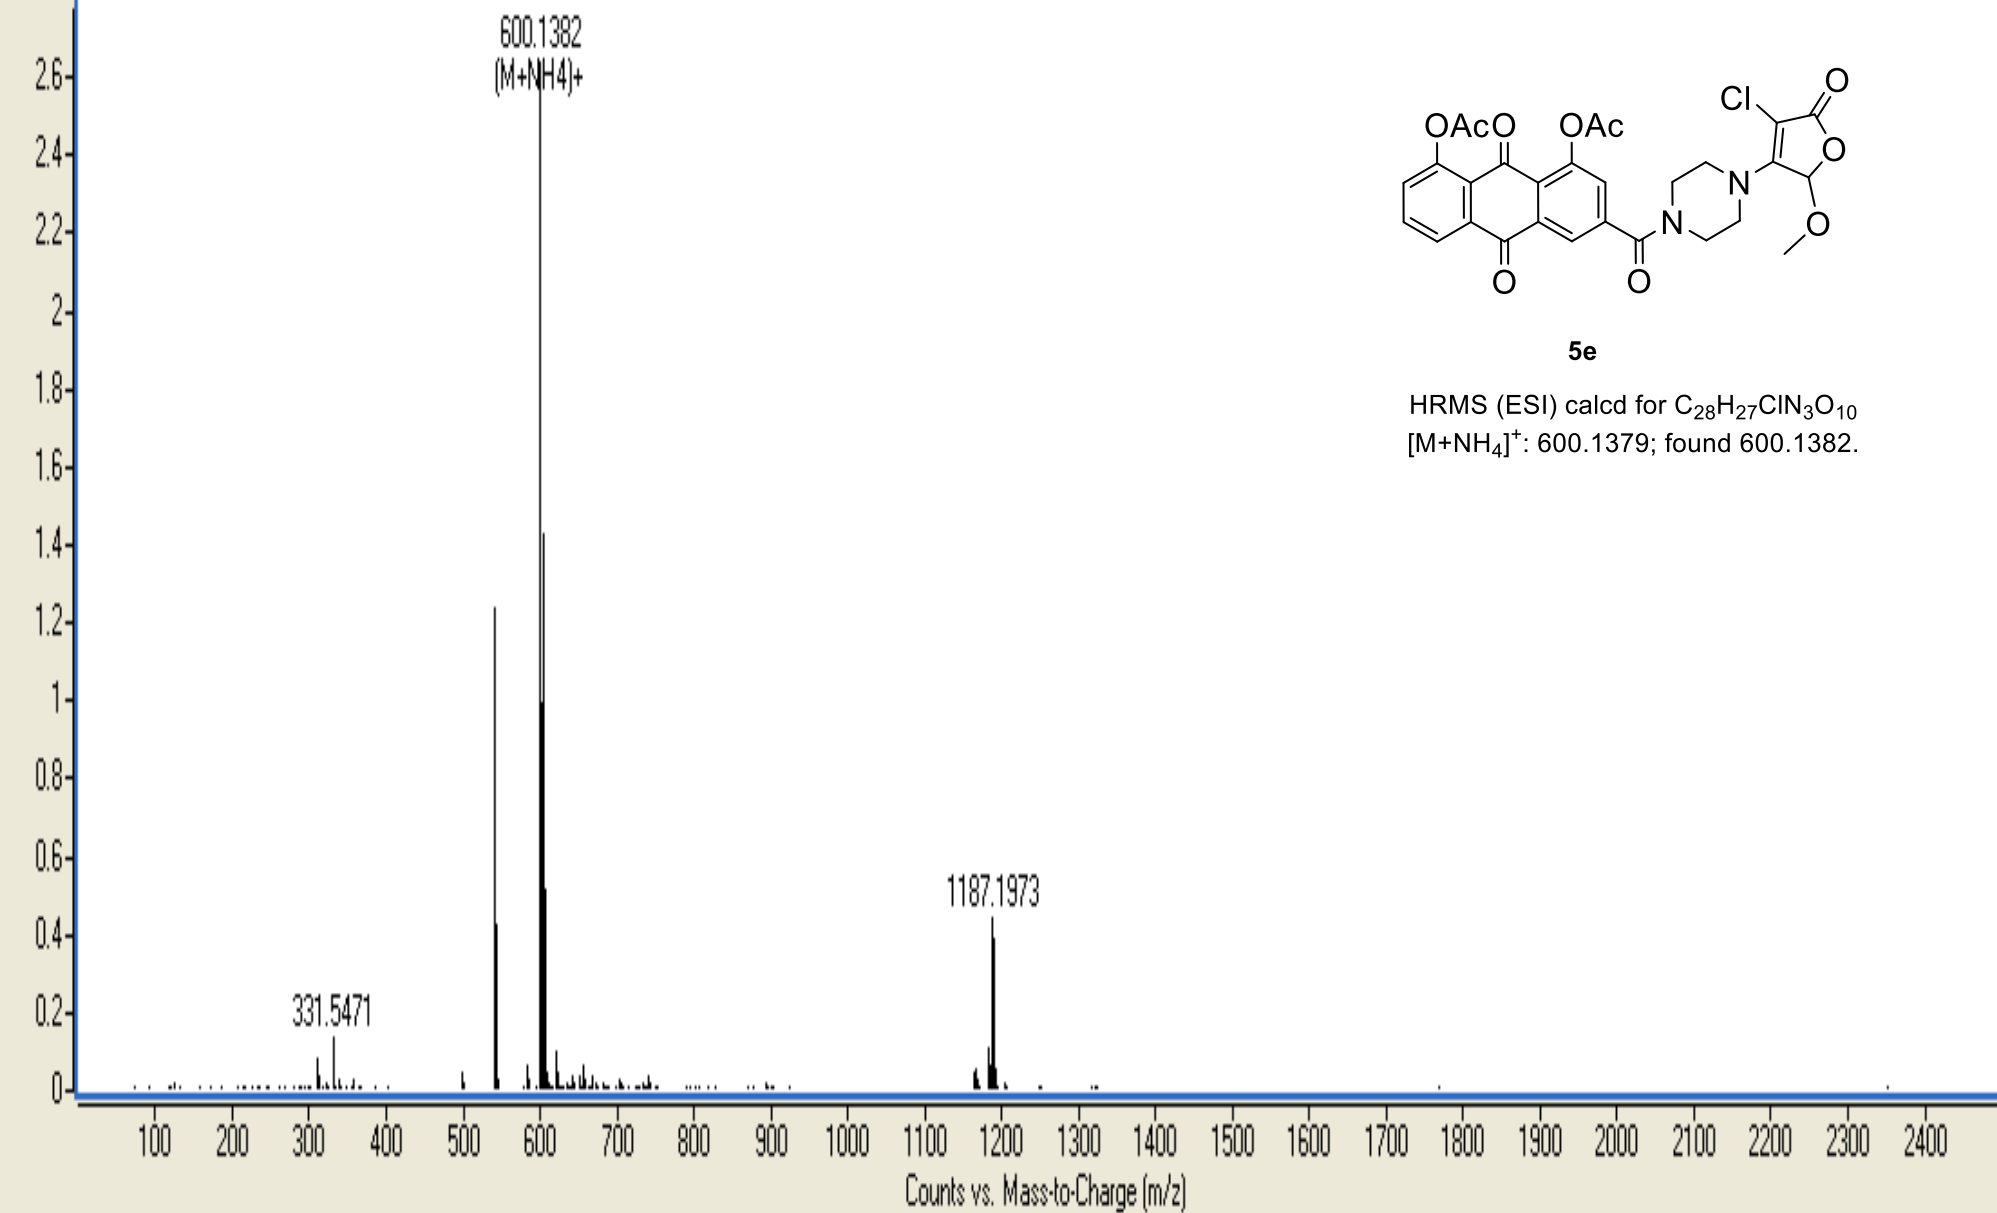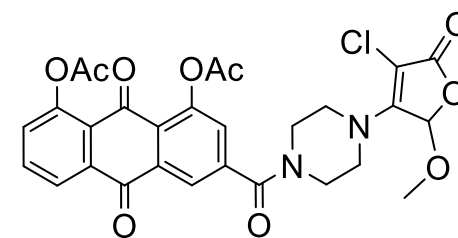

**5e**

HRMS (ESI) calcd for C<sub>28</sub>H<sub>27</sub>ClN<sub>3</sub>O<sub>10</sub>  
[M+NH<sub>4</sub>]<sup>+</sup>: 600.1379; found 600.1382.

HRMS spectrum of **5e**



zss-313-H

8.197  
8.178  
7.797  
7.777  
7.758  
7.457  
7.454  
7.431  
7.412  
7.260

5.800

3.819  
3.682  
3.582  
3.571  
3.556  
3.546  
3.530  
3.520  
2.452  
2.431  
2.424  
2.193  
2.162  
2.086  
2.070  
2.054  
2.014  
1.644  
1.628  
1.620  
1.324  
1.296  
1.268  
1.244  
1.226  
1.208  
1.142  
1.111  
1.083  
0.954  
0.914  
0.906  
0.897  
0.891  
0.831  
0.803  
0.730  
0.713

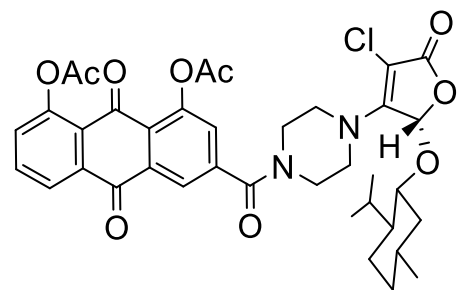

5f

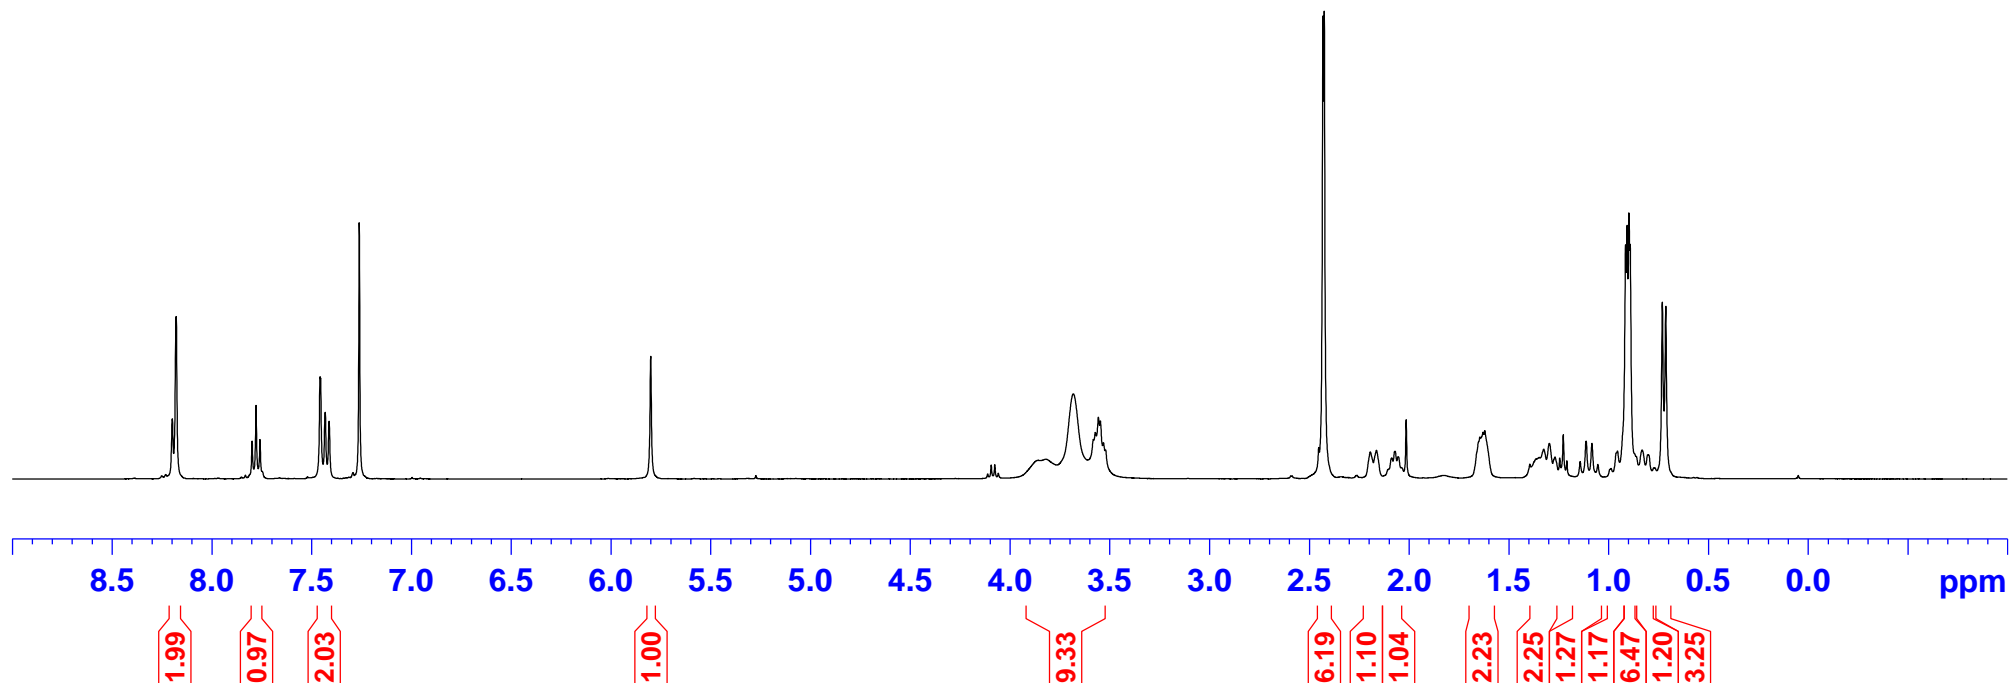

<sup>1</sup>H NMR (400 MHz, CDCl<sub>3</sub>) spectrum of 5f

zss-313-C

181.17  
180.16  
169.41  
169.20  
167.74  
167.01  
154.87  
150.52  
150.19  
140.61  
135.14  
134.72  
134.17  
130.73  
129.01  
126.51  
125.66  
125.50  
123.64

97.16

89.29

81.22  
77.48  
77.16  
76.84

48.11  
47.42  
42.40  
42.02

33.87  
31.67

25.27  
22.70  
22.27  
21.19  
21.12  
15.77

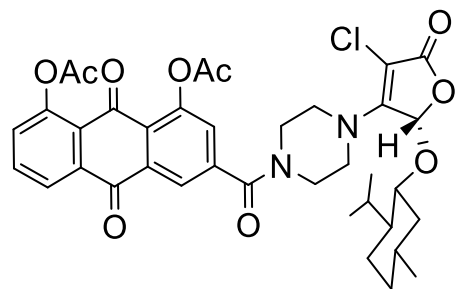

5f

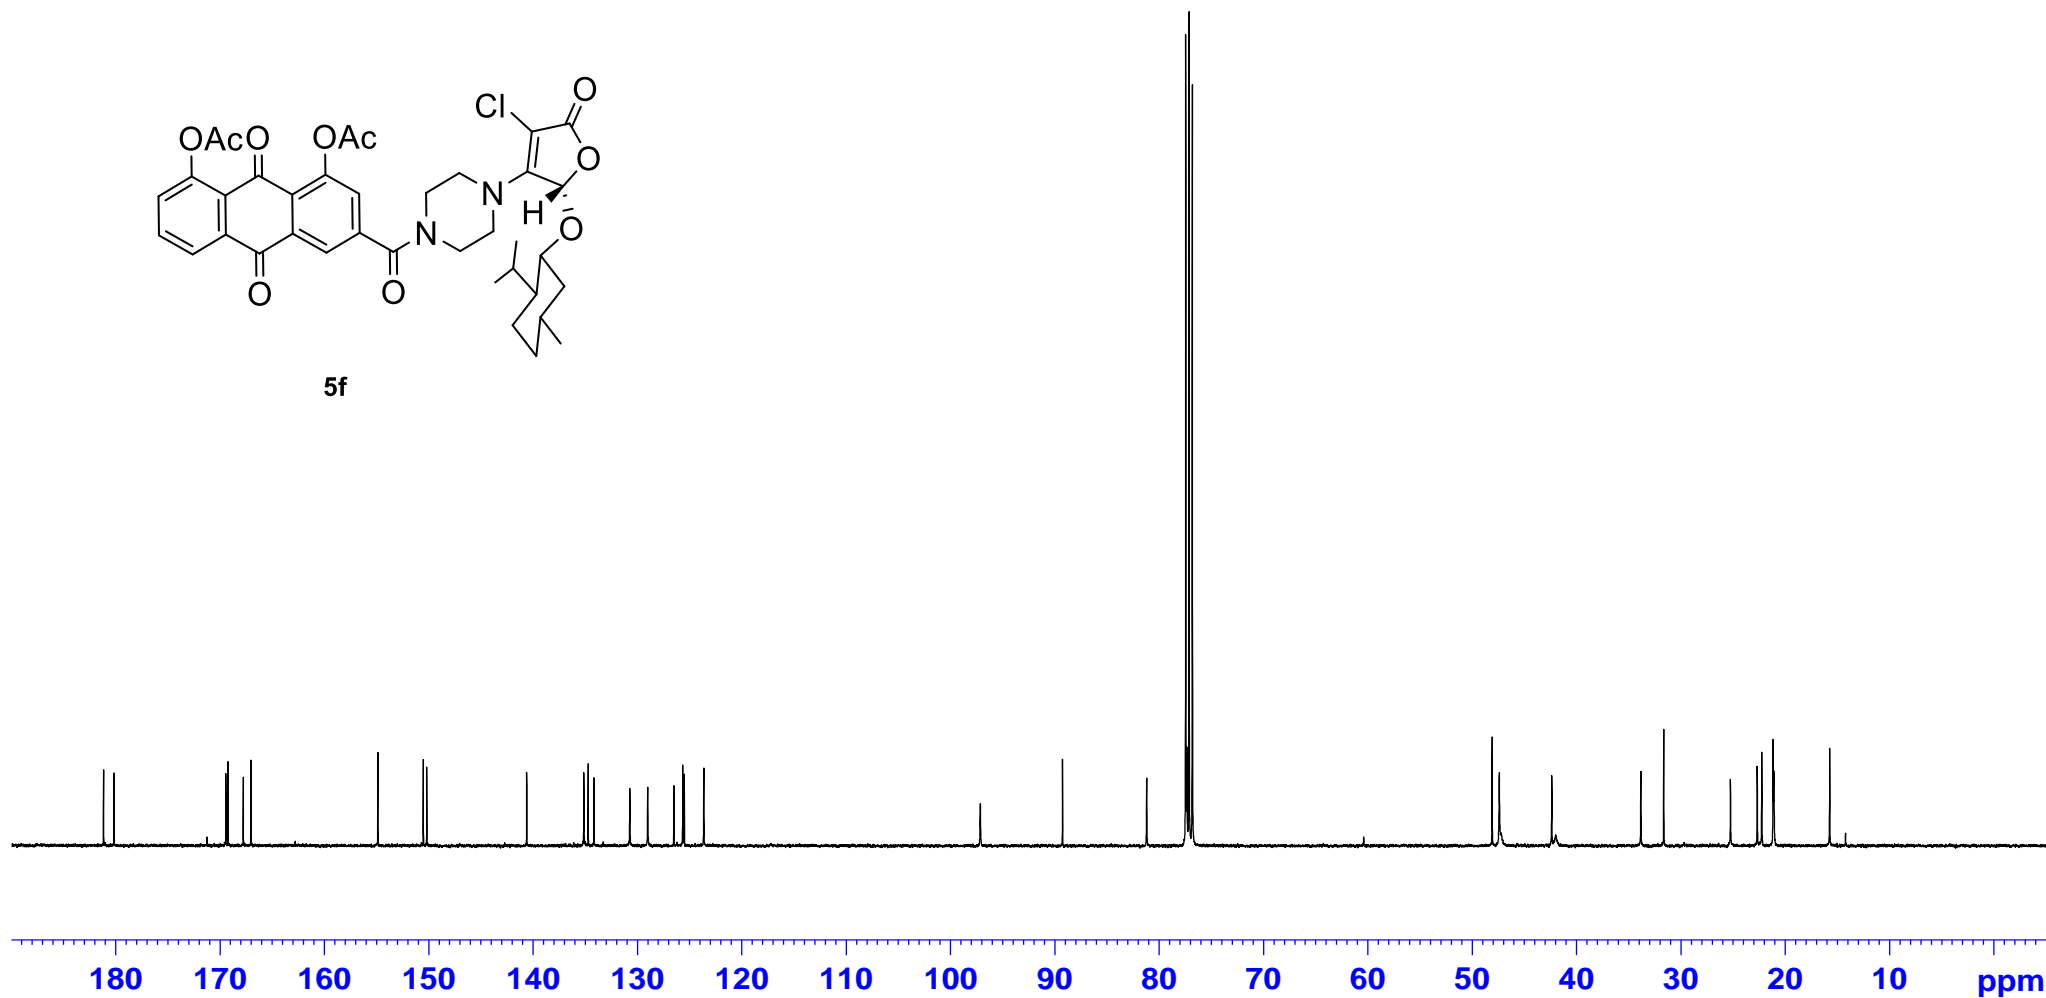

<sup>13</sup>C NMR (101 MHz, CDCl<sub>3</sub>) spectrum of 5f

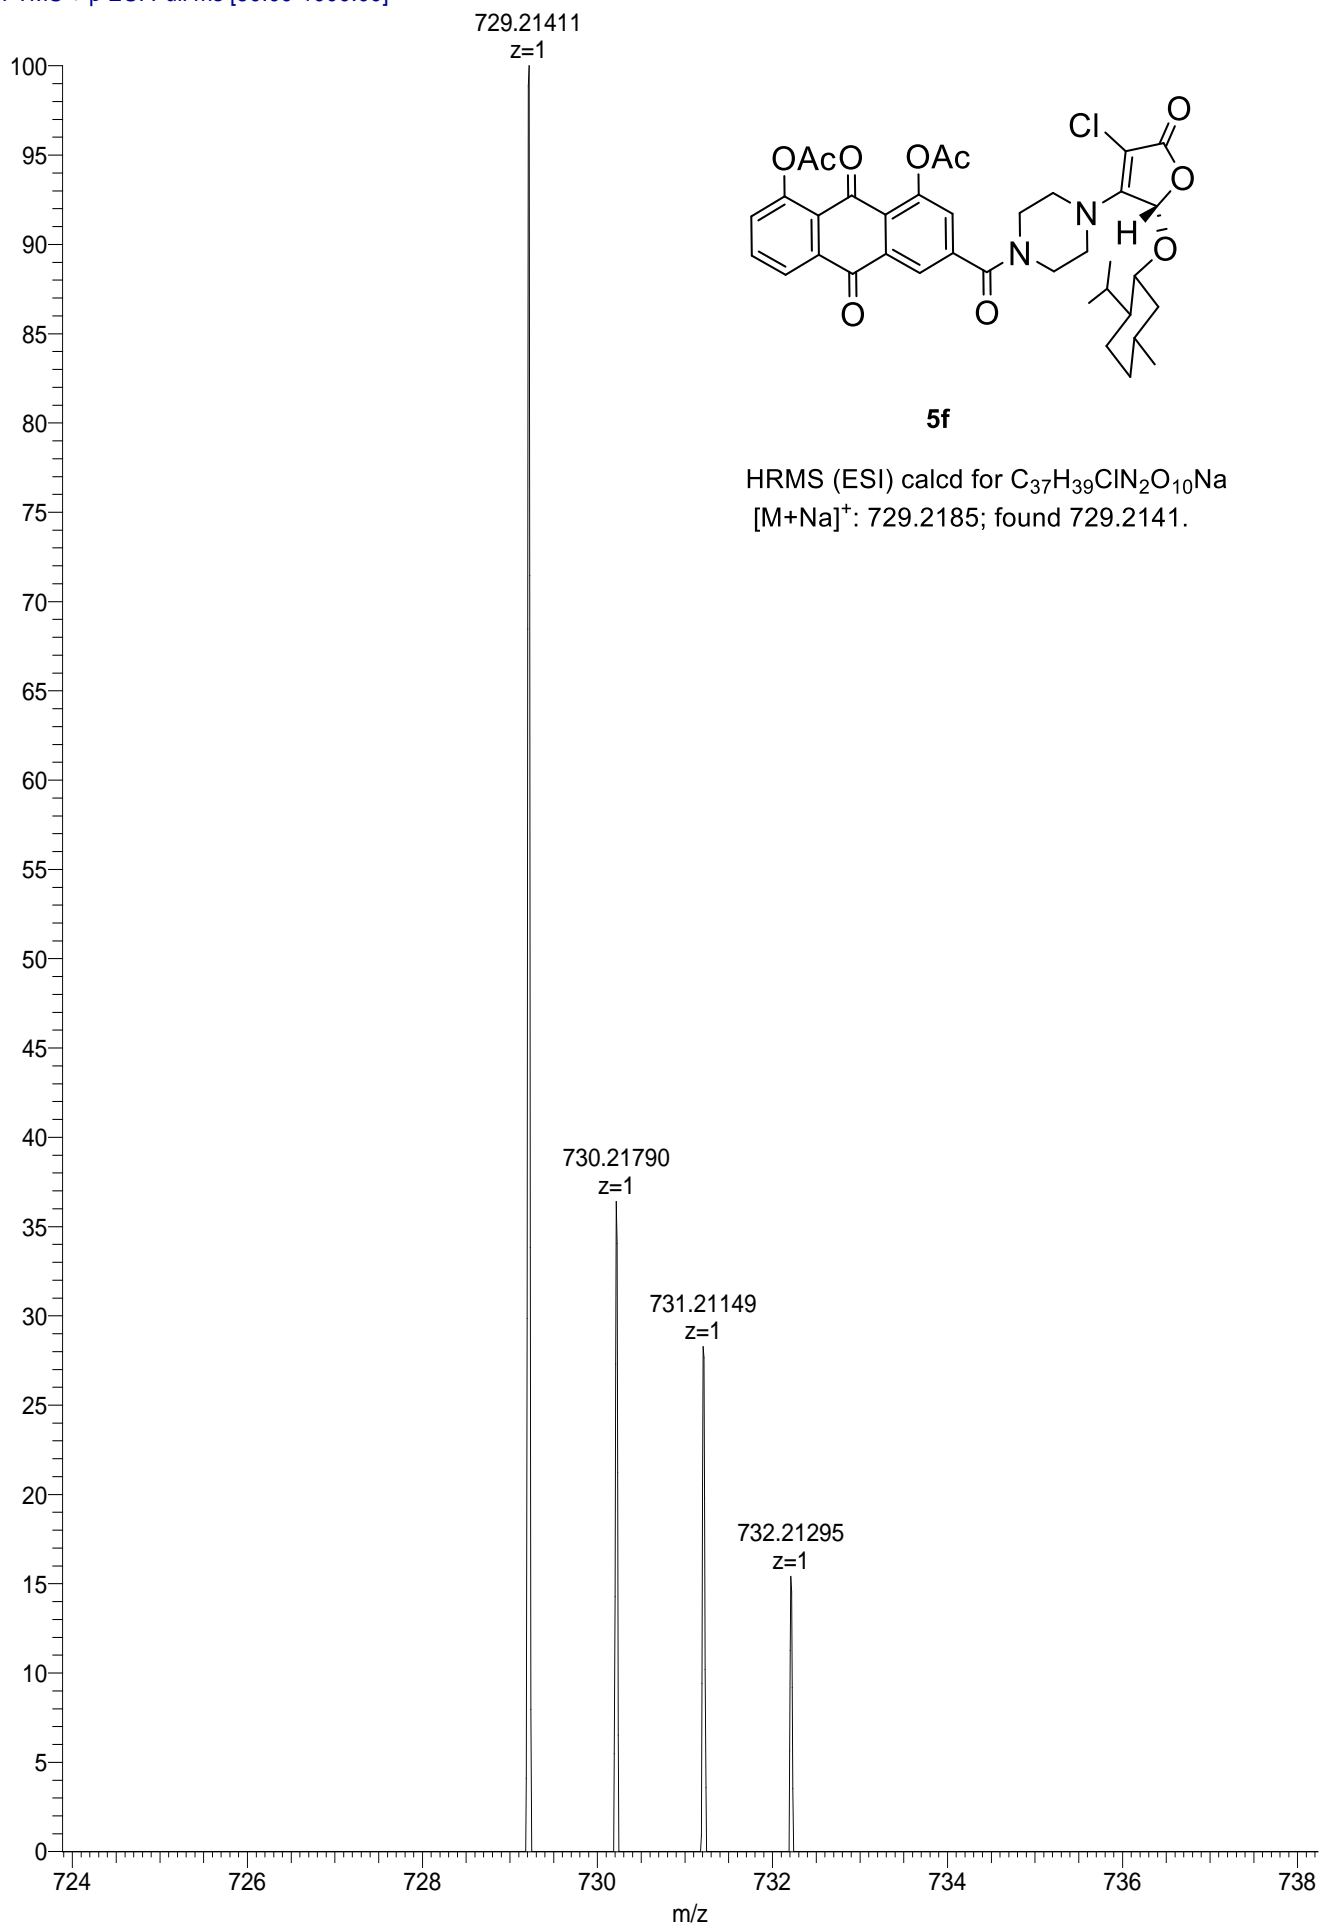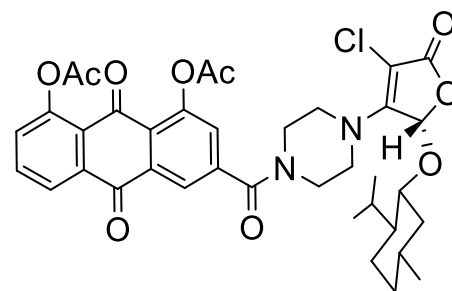

**5f**

HRMS (ESI) calcd for C<sub>37</sub>H<sub>39</sub>ClN<sub>2</sub>O<sub>10</sub>Na  
[M+Na]<sup>+</sup>: 729.2185; found 729.2141.

HRMS spectrum of **5f**

8.192  
8.173  
7.796  
7.776  
7.756  
7.453  
7.430  
7.410  
7.260

5.720  
5.701

4.126  
4.104  
3.930  
3.909  
3.739  
3.568  
2.472  
2.428  
2.421  
2.251  
2.226  
2.218  
2.204  
2.195  
1.854  
1.829  
1.799  
1.765  
1.714  
1.678  
1.668  
1.639  
1.628  
1.261  
1.234  
1.227  
1.077  
1.024  
1.017  
0.991  
0.983  
0.898  
0.879  
0.843  
0.825  
0.813  
0.804  
0.777

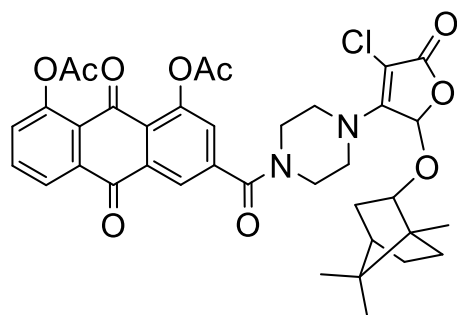

5g

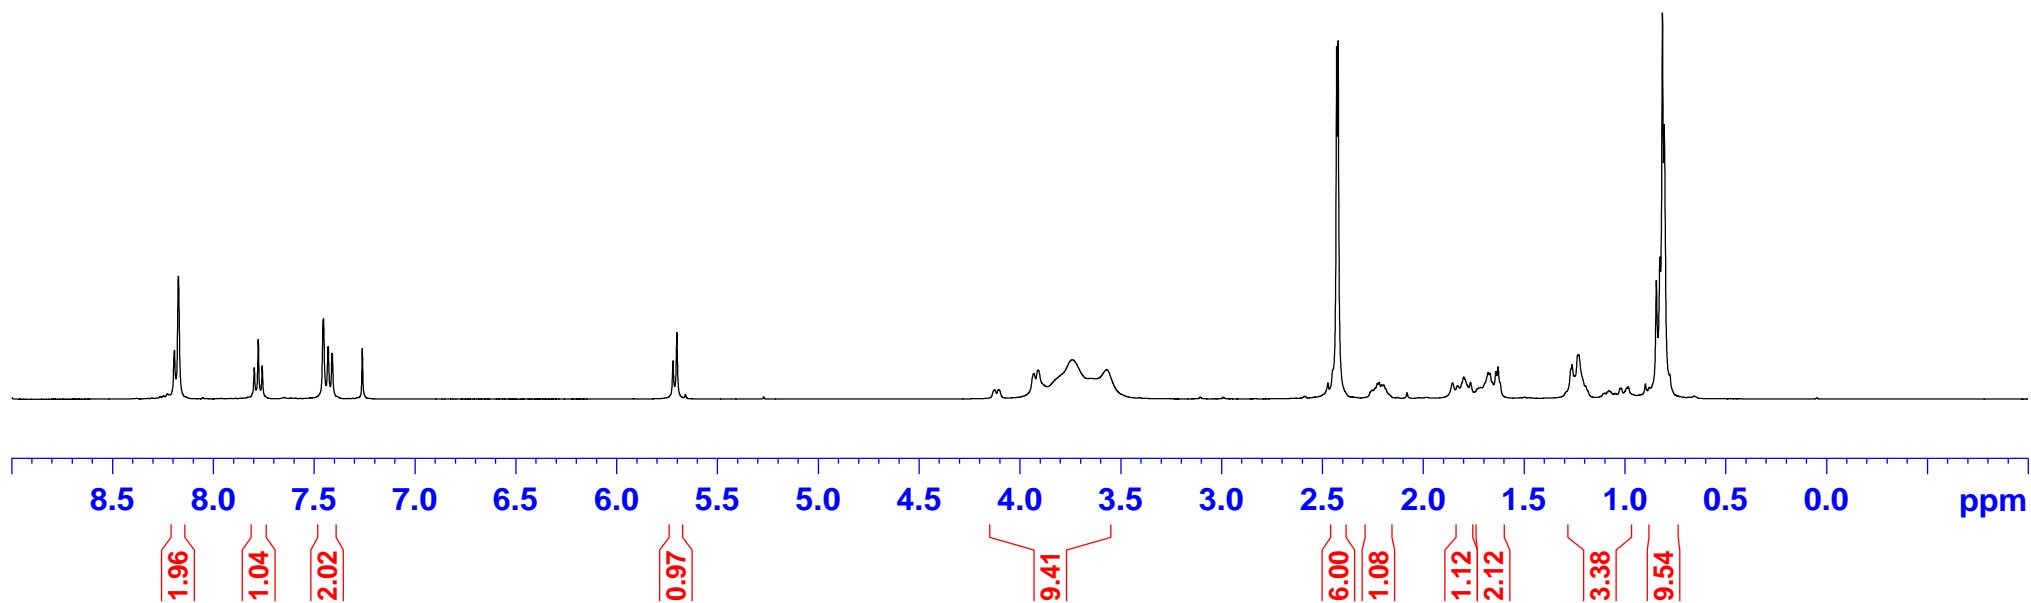

<sup>1</sup>H NMR (400 MHz, CDCl<sub>3</sub>) spectrum of 5g

181.15  
180.15  
169.41  
169.21  
167.77  
167.03  
154.36  
150.47  
150.14  
140.66  
135.12  
134.68  
134.12  
130.70  
128.97  
126.43  
125.62  
125.45  
123.60

98.39

88.44  
87.83

77.49  
77.16  
76.84

49.41  
47.56  
47.36  
44.80  
42.18  
37.24

28.00  
26.62  
21.09  
19.60  
18.79  
14.26

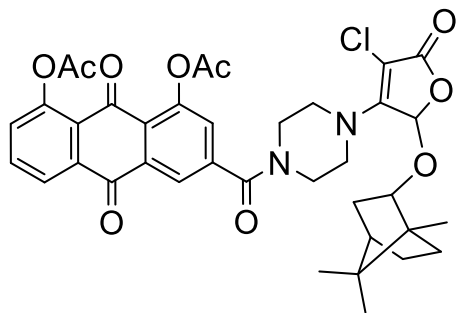

5g

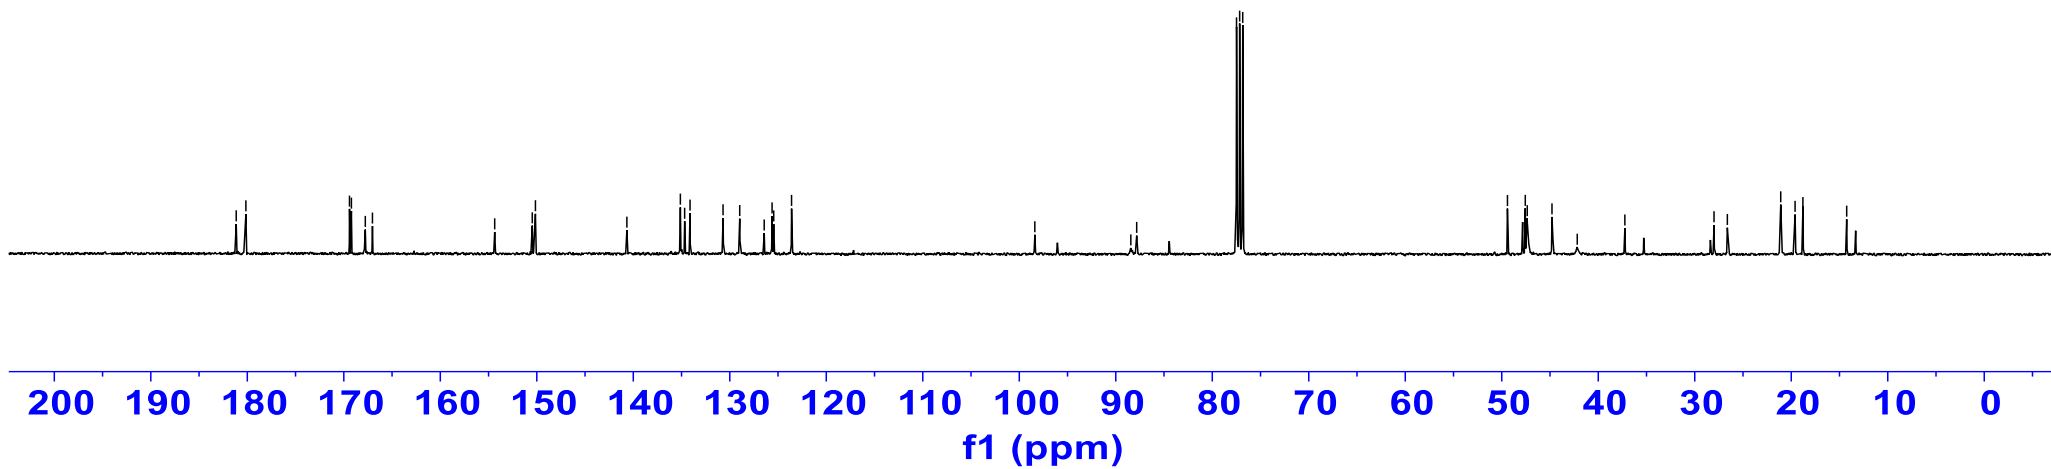

<sup>13</sup>C NMR (101 MHz, CDCl<sub>3</sub>) spectrum of 5g

x10<sup>5</sup> +ESI Scan (2.678 min) Frag=130.0V 2g.d Subtract (2)

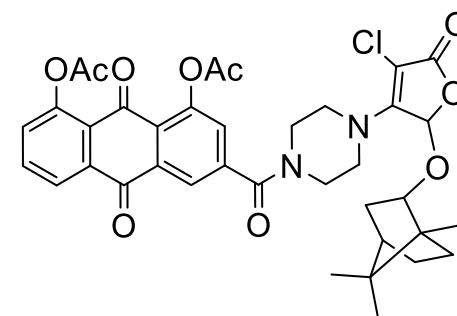

**5g**

HRMS (ESI) calcd for C<sub>37</sub>H<sub>41</sub>ClN<sub>3</sub>O<sub>10</sub>  
[M+NH<sub>4</sub>]<sup>+</sup>: 722.2475; found 722.2475.

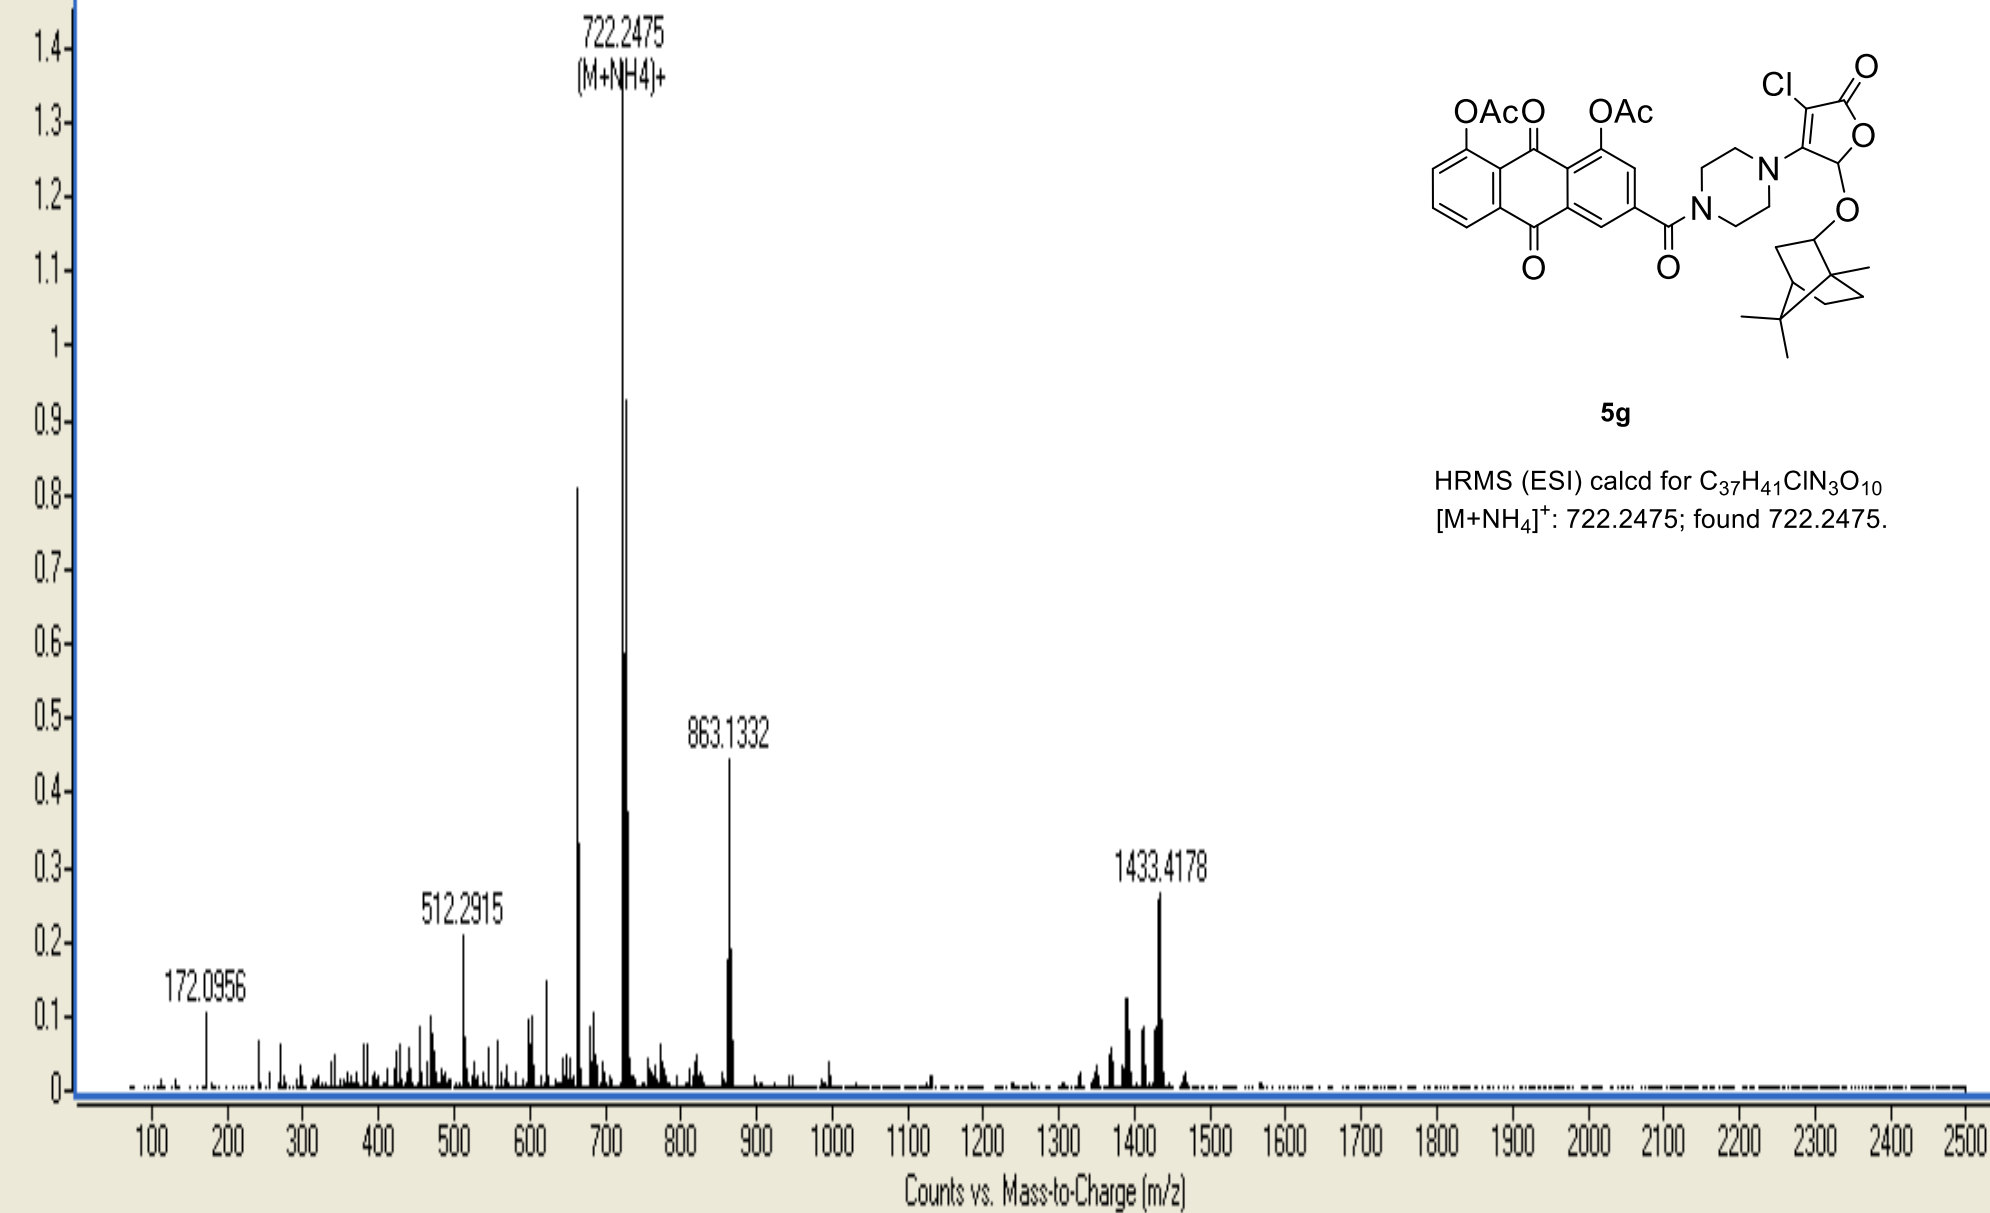

HRMS spectrum of **5g**

zss-319-H

8.188  
8.163  
7.798  
7.778  
7.758  
7.446  
7.429  
7.410  
7.260

5.683

3.833  
3.722  
3.546  
3.456

2.449  
2.428  
2.420

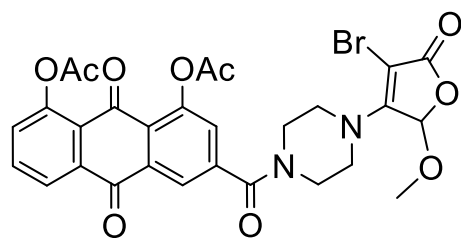

5h

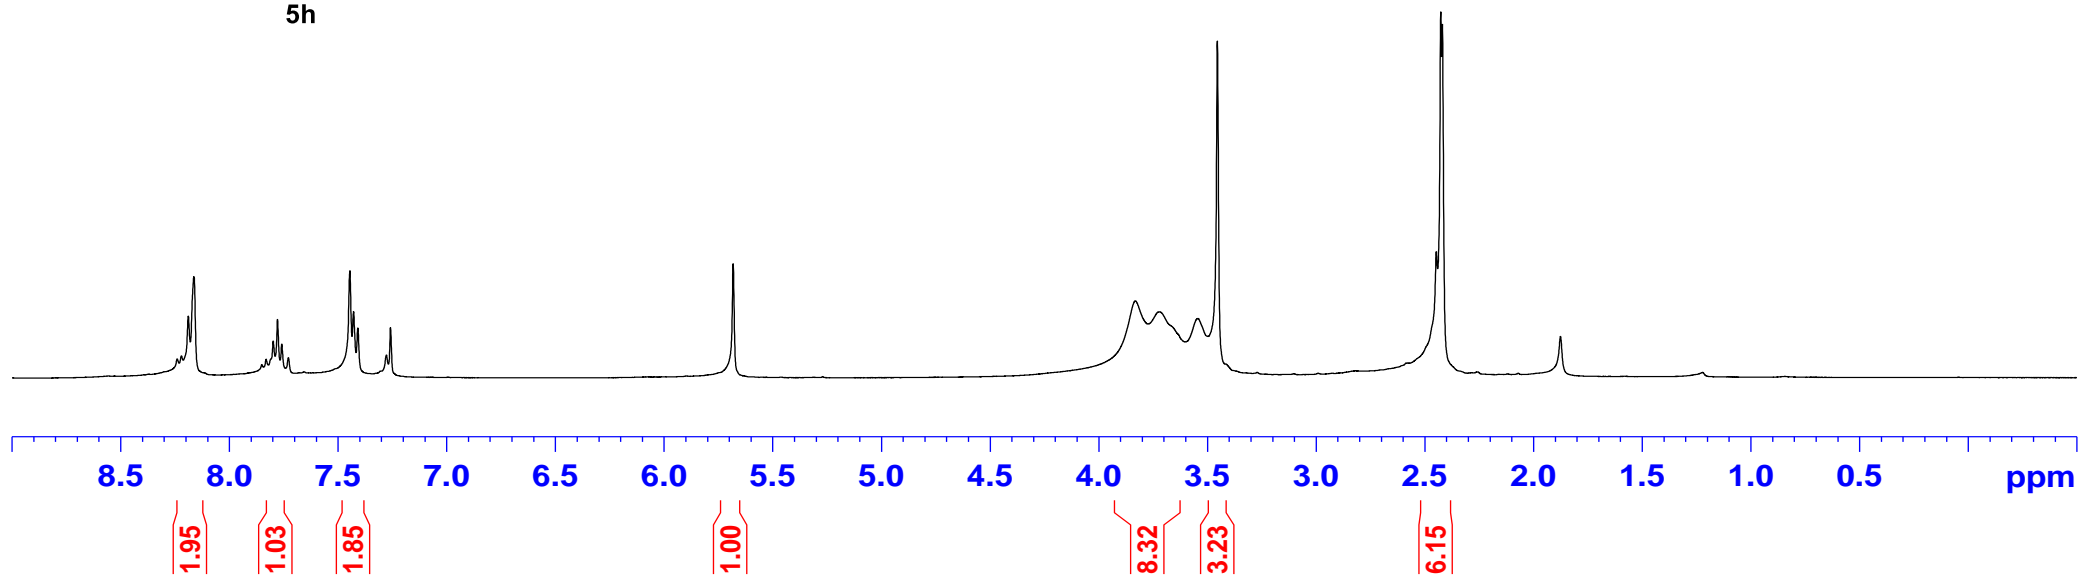

<sup>1</sup>H NMR (400 MHz, CDCl<sub>3</sub>) spectrum of **5h**

zss-319-C

181.18  
180.15  
169.45  
169.28  
168.06  
167.04  
156.34  
150.46  
150.14  
140.73  
135.15  
134.67  
134.12  
130.73  
128.95  
126.41  
125.63  
125.44  
123.61

98.49

77.48  
77.16  
76.84  
74.65

55.20

47.56

42.09

21.11

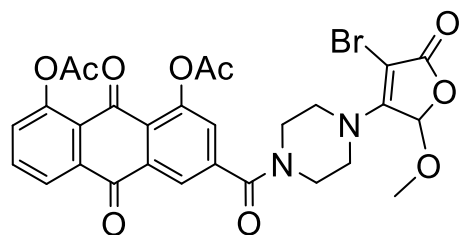

5h

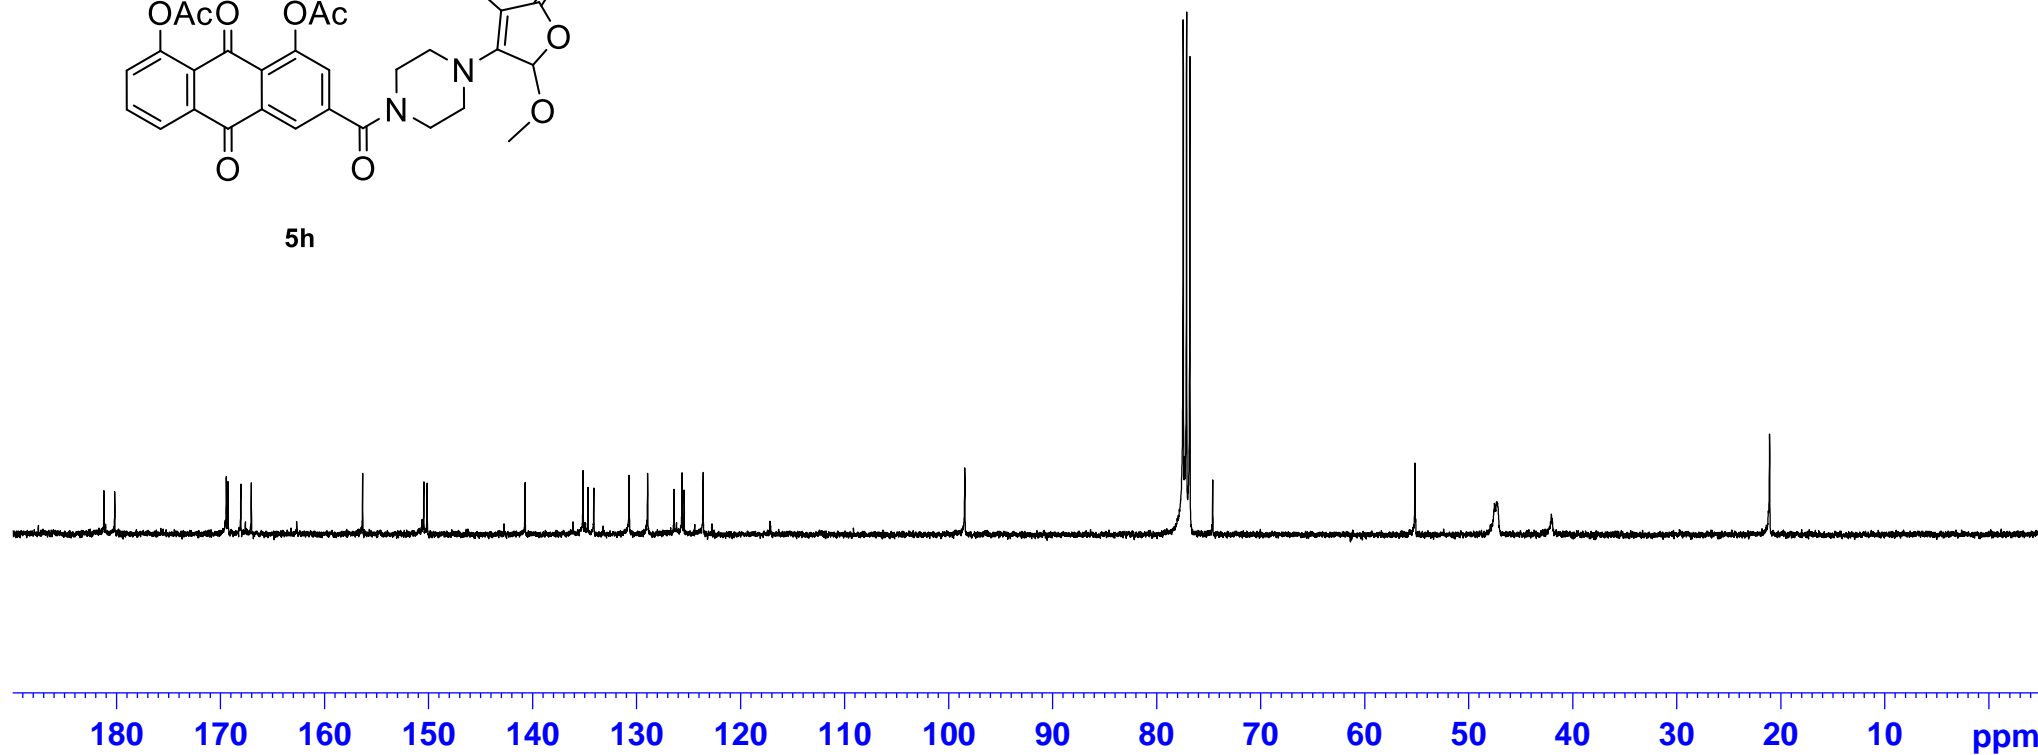

<sup>13</sup>C NMR (101 MHz, CDCl<sub>3</sub>) spectrum of 5h



x10<sup>5</sup> +ESI Scan (2.138 min) Frag=130.0V 2h.d Subtract

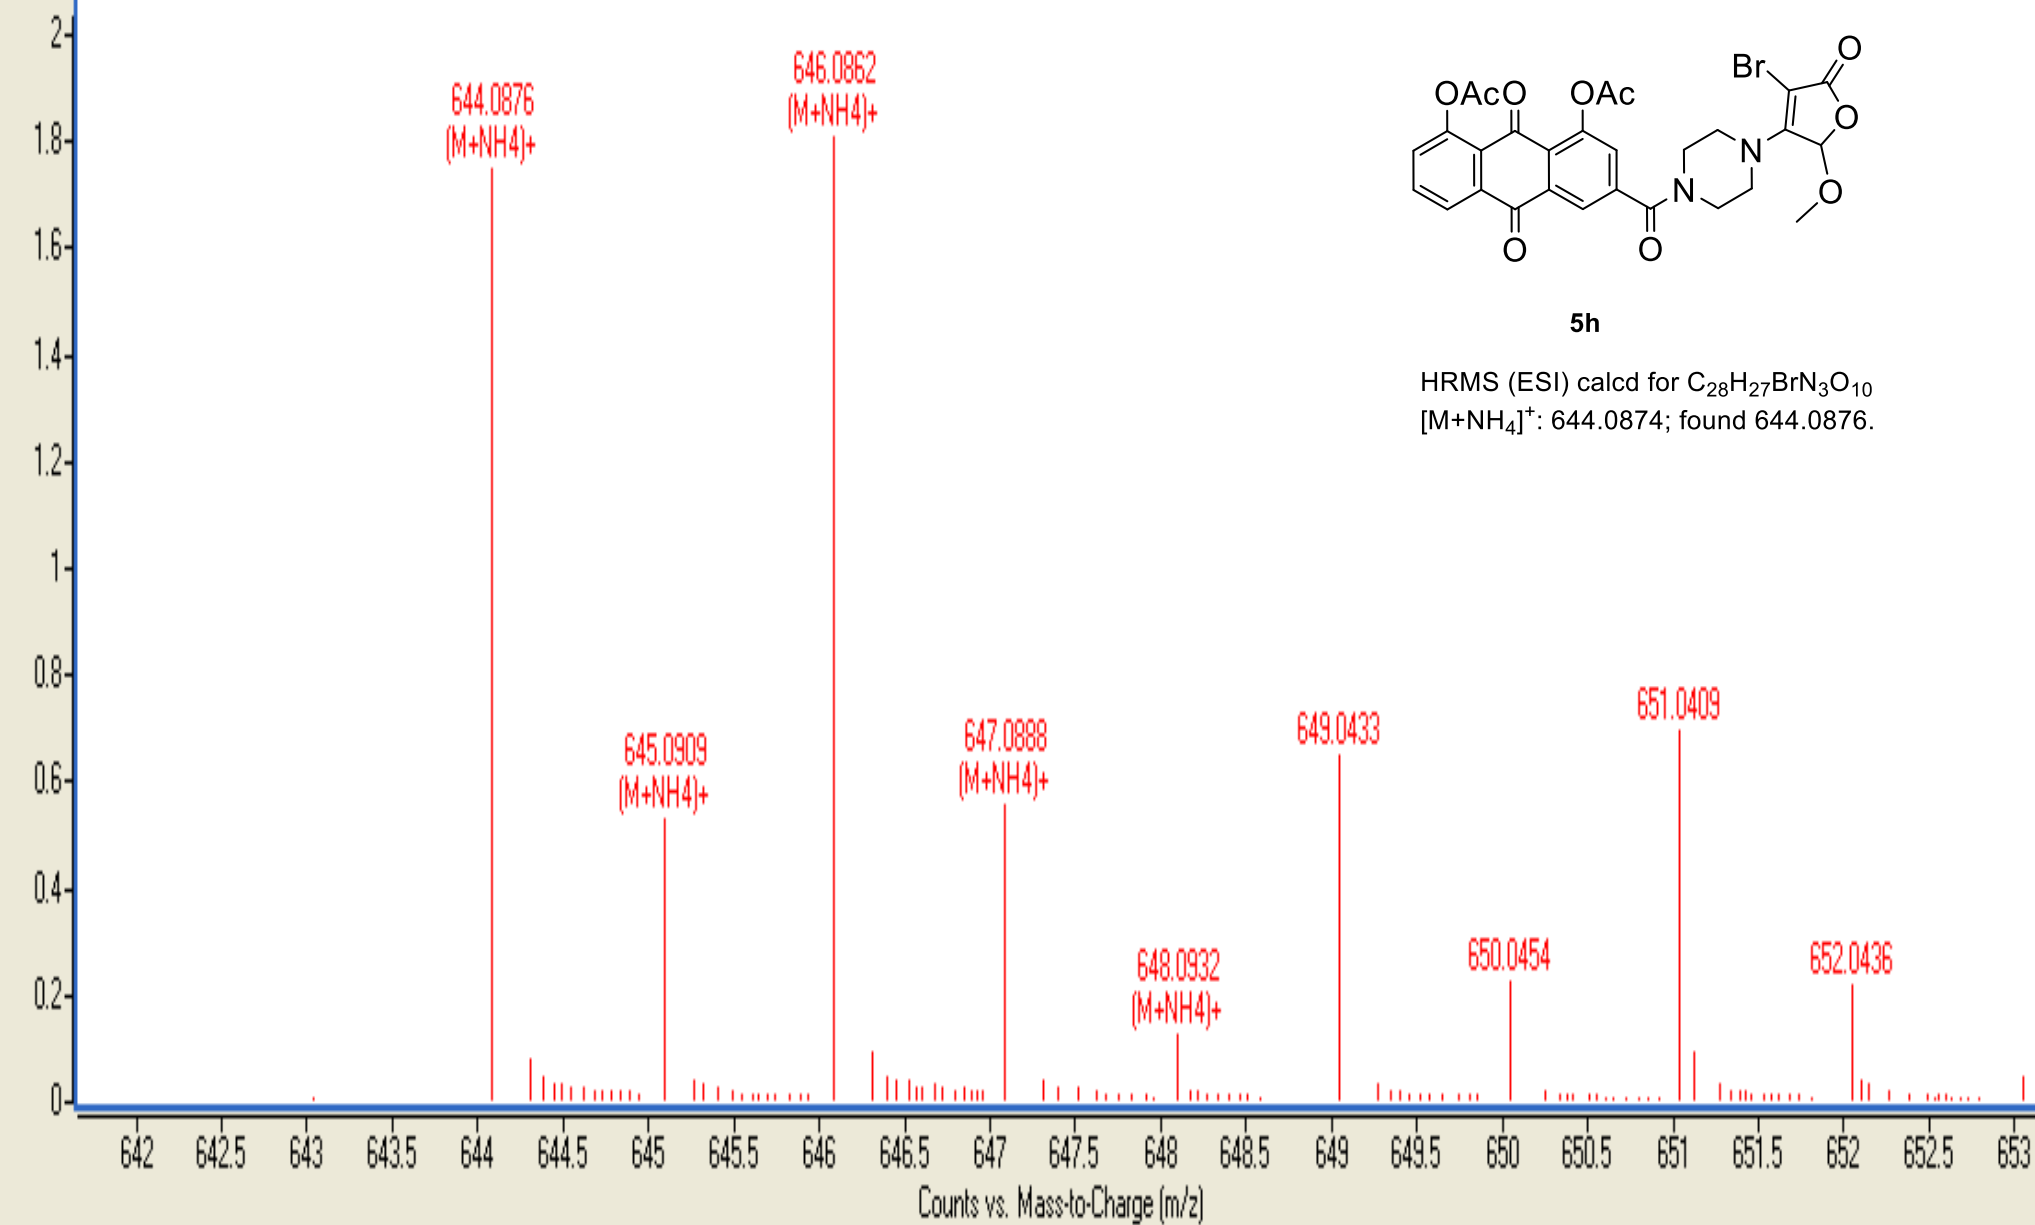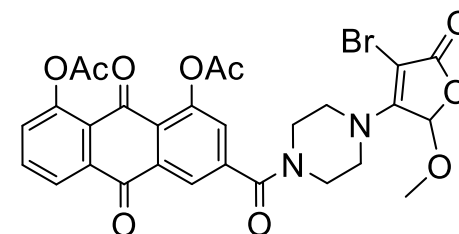

**5h**

HRMS (ESI) calcd for C<sub>28</sub>H<sub>27</sub>BrN<sub>3</sub>O<sub>10</sub>  
[M+NH<sub>4</sub>]<sup>+</sup>: 644.0874; found 644.0876.

HRMS spectrum of **5h**

zss-315-H

8.211  
8.193  
8.191  
7.808  
7.788  
7.769  
7.469  
7.466  
7.441  
7.421  
7.260

5.826

3.856  
3.741  
3.594  
3.583  
3.567  
3.557  
3.541  
3.531  
2.441  
2.434  
2.202  
2.171  
2.092  
2.080  
2.076  
2.062  
1.669  
1.661  
1.652  
1.637  
1.628  
1.363  
1.355  
1.333  
1.306  
1.277  
1.154  
1.123  
1.095  
0.970  
0.963  
0.923  
0.913  
0.906  
0.897  
0.875  
0.838  
0.811  
0.804  
0.742  
0.725

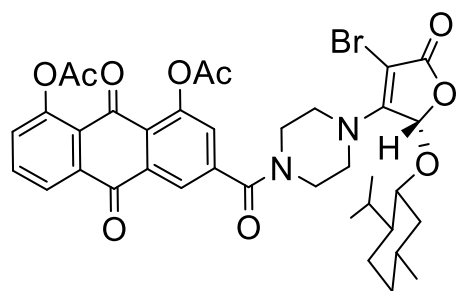

5i

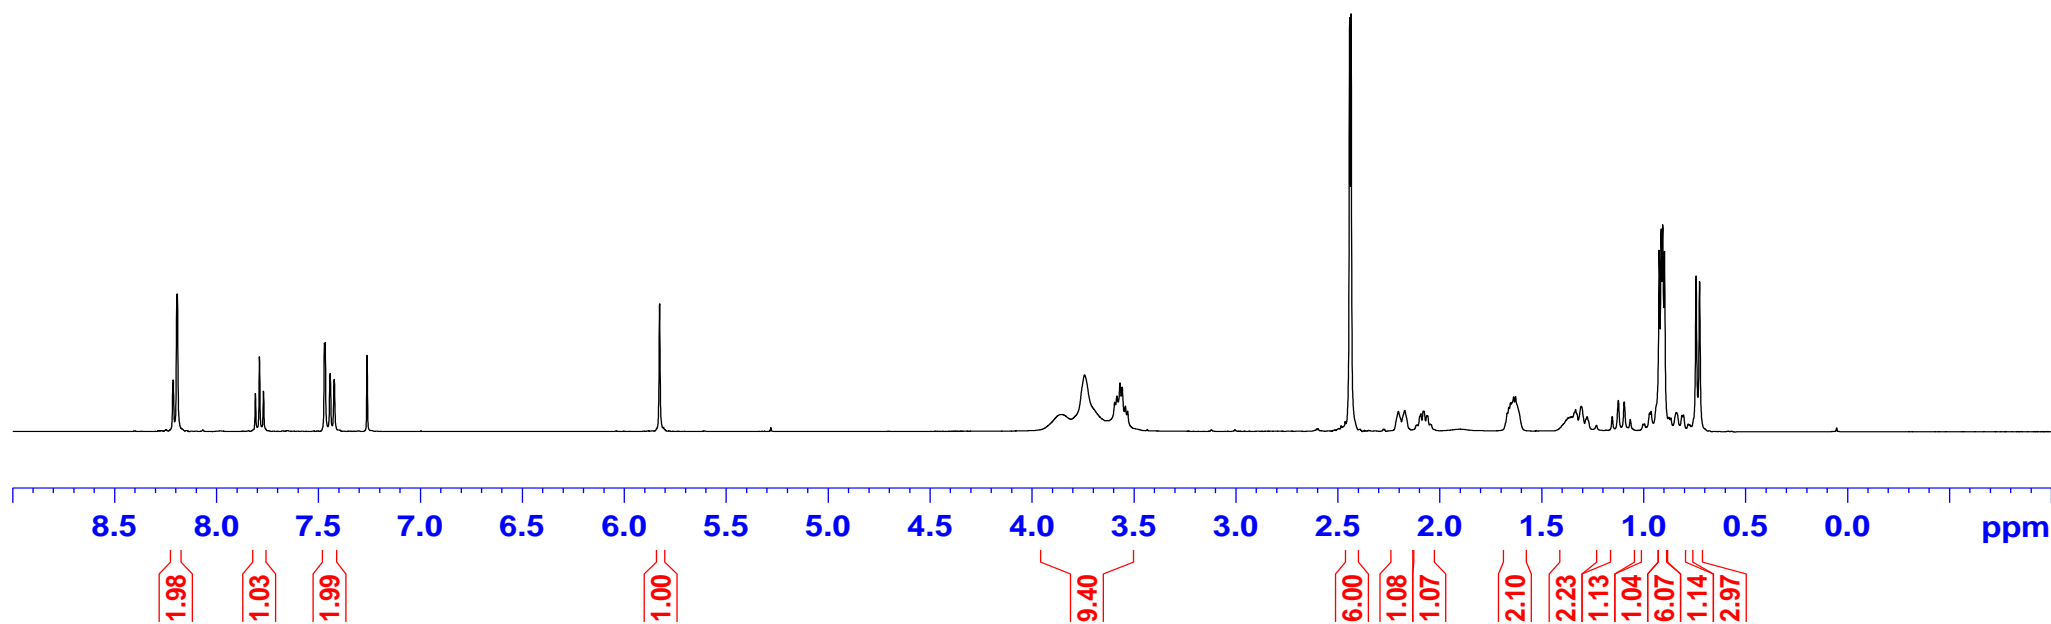

<sup>1</sup>H NMR (400 MHz, CDCl<sub>3</sub>) spectrum of 5i

zss-315-C

181.21  
180.19  
169.46  
169.26  
168.22  
167.07  
157.58  
150.56  
150.22  
140.62  
135.17  
134.75  
134.19  
130.76  
129.05  
126.56  
125.71  
125.53  
123.66

98.16

81.16  
77.48  
77.16  
76.84  
75.99

48.15  
47.59  
42.44  
42.03

33.89  
31.71

25.31  
22.74  
22.30  
21.22  
21.14  
15.82

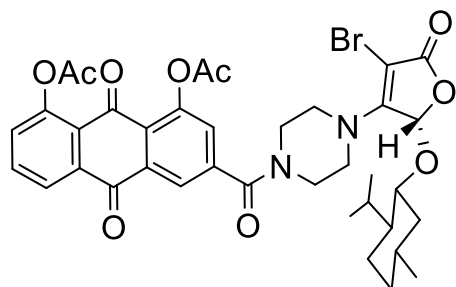

**5i**

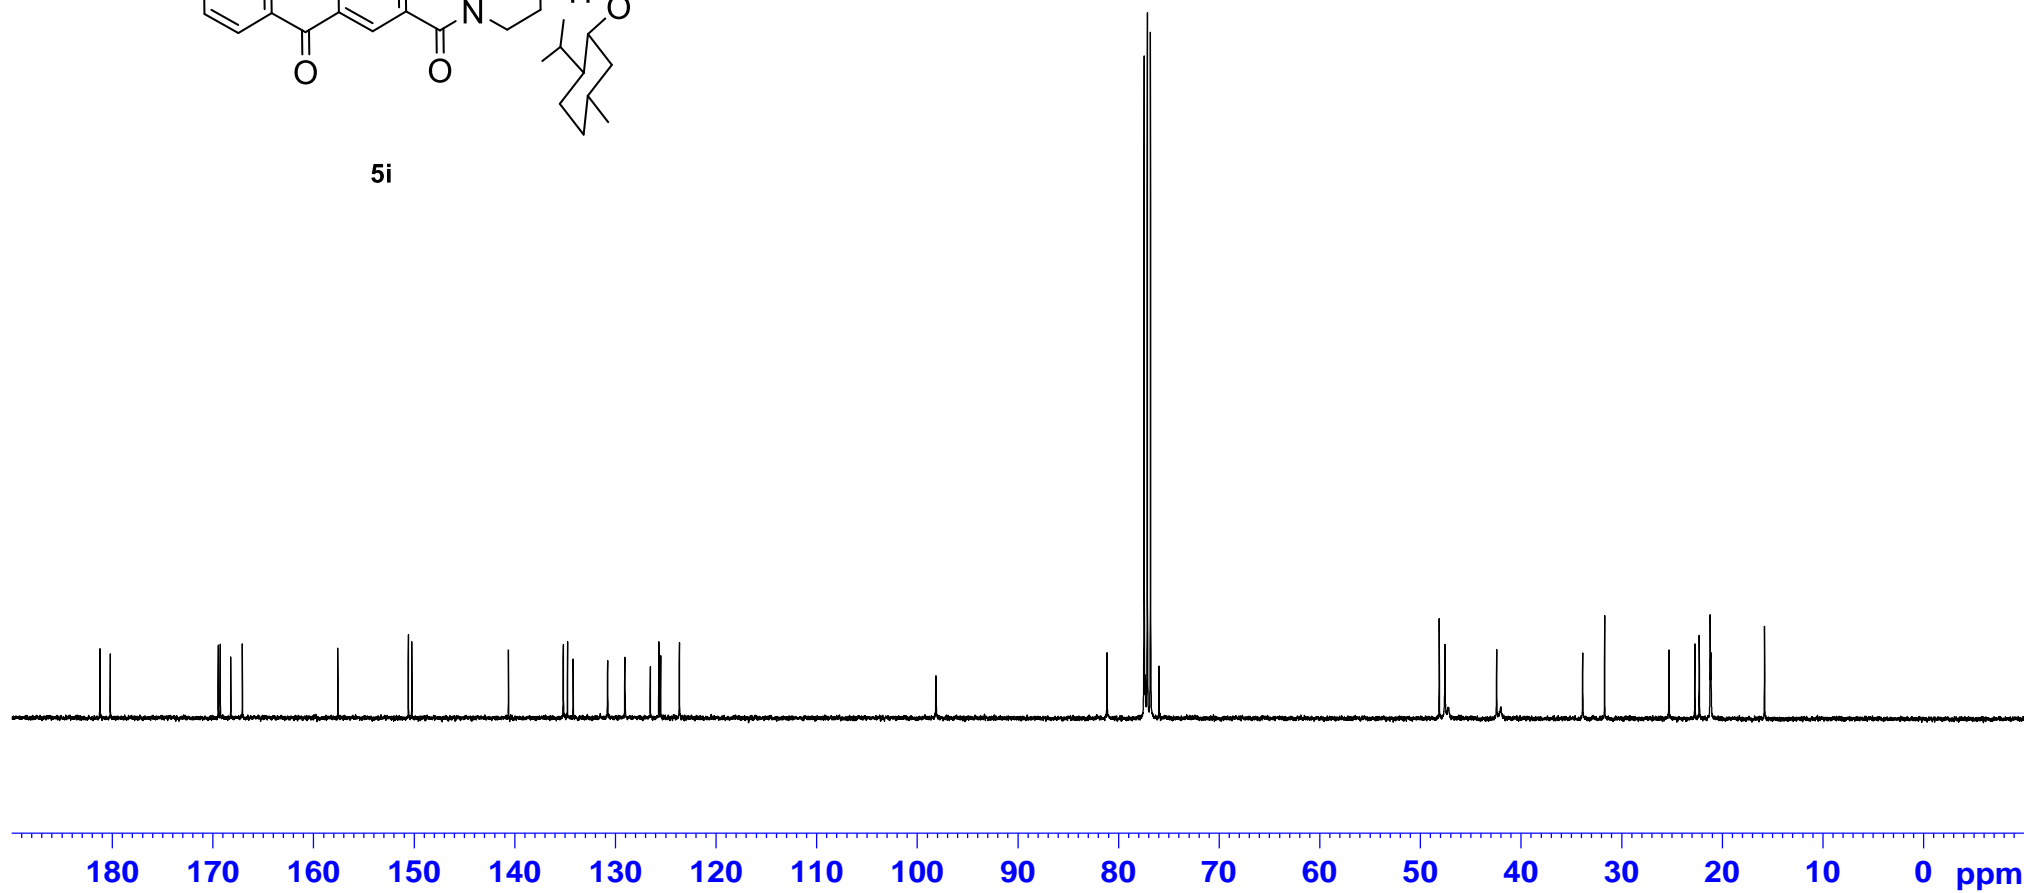

$^{13}\text{C}$  NMR (101 MHz,  $\text{CDCl}_3$ ) spectrum of **5i**

x10<sup>5</sup> +ESI Scan (2.556 min) Frag=130.0V 21.d Subtract

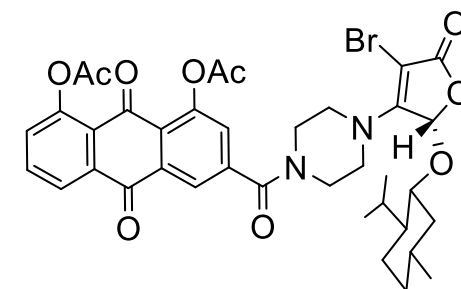

**5i**

HRMS (ESI) calcd for C<sub>37</sub>H<sub>43</sub>BrN<sub>3</sub>O<sub>10</sub>  
[M+NH<sub>4</sub>]<sup>+</sup>: 768.2126; found 768.2124.

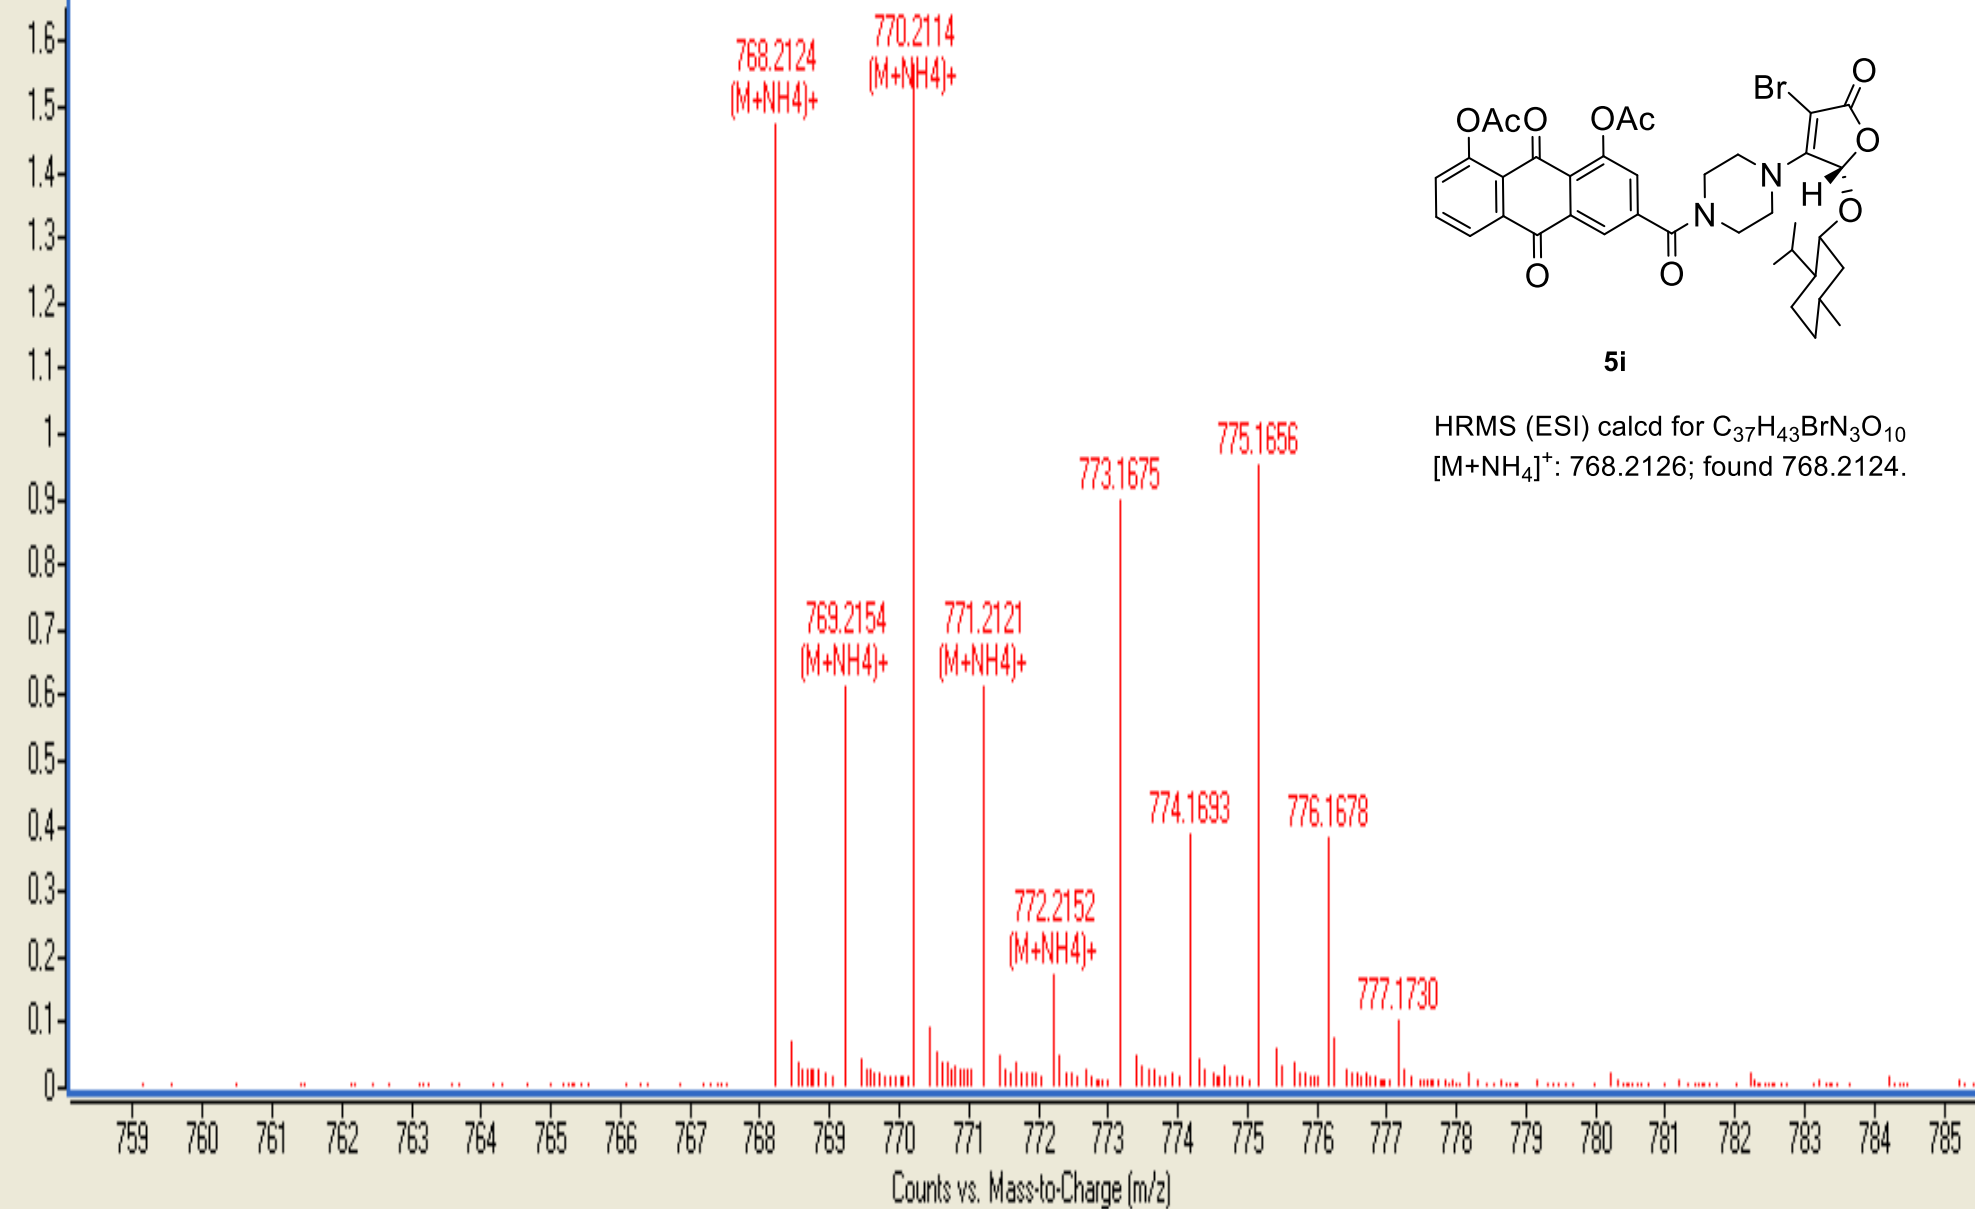

HRMS spectrum of **5i**

8.206  
8.185  
7.805  
7.785  
7.765  
7.463  
7.438  
7.418  
7.260

5.747  
5.728

3.941  
3.919  
3.831  
3.764  
3.579  
2.478  
2.458  
2.438  
2.430  
2.265  
2.239  
2.230  
2.216  
2.205  
1.837  
1.809  
1.799  
1.775  
1.725  
1.691  
1.647  
1.637  
1.279  
1.272  
1.245  
1.238  
1.204  
0.990  
0.907  
0.891  
0.852  
0.833  
0.822  
0.784

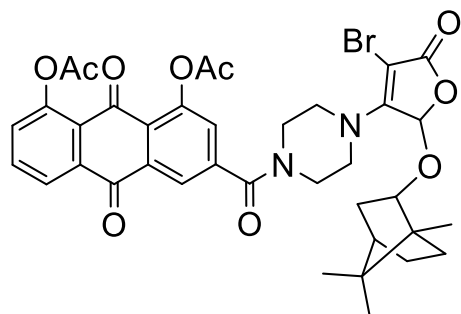

5j

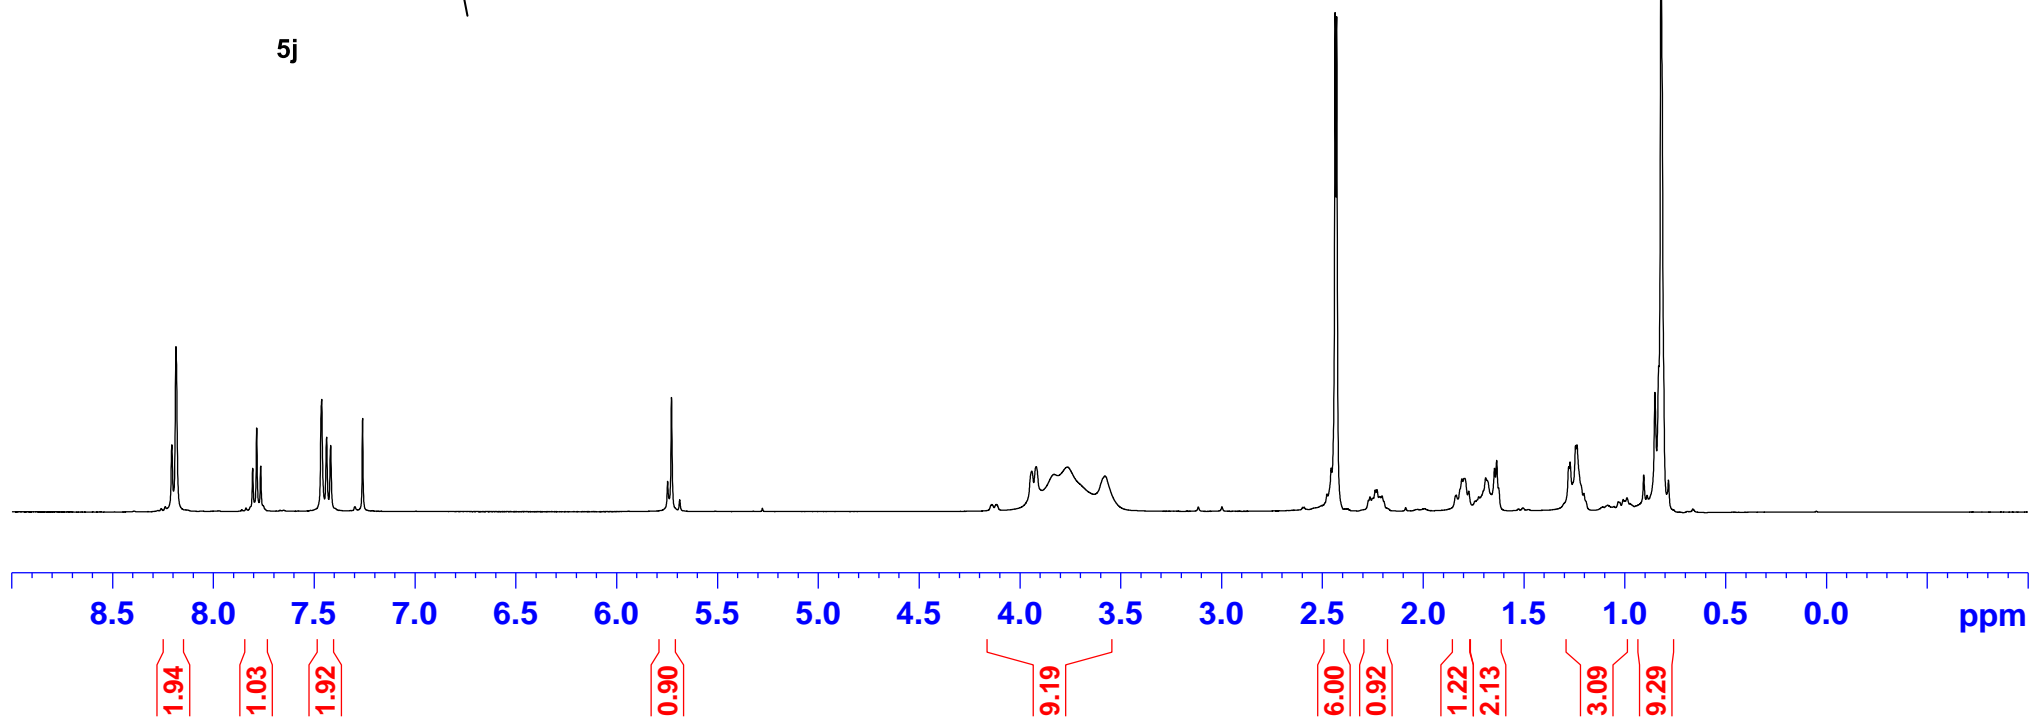 $^1\text{H}$  NMR (400 MHz,  $\text{CDCl}_3$ ) spectrum of **5j**

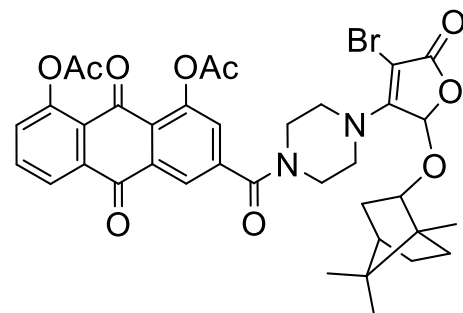

5j

181.20  
180.18  
169.43  
169.24  
168.20  
167.08  
157.01  
150.53  
150.18  
140.67  
135.15  
134.73  
134.16  
130.74  
129.02  
126.50  
125.67  
125.50  
123.63

99.38

87.78

77.48  
77.16  
76.84  
75.23

49.45  
47.61  
47.52  
44.83  
42.23  
37.29

28.04  
26.67  
21.14  
19.64  
18.83  
14.32

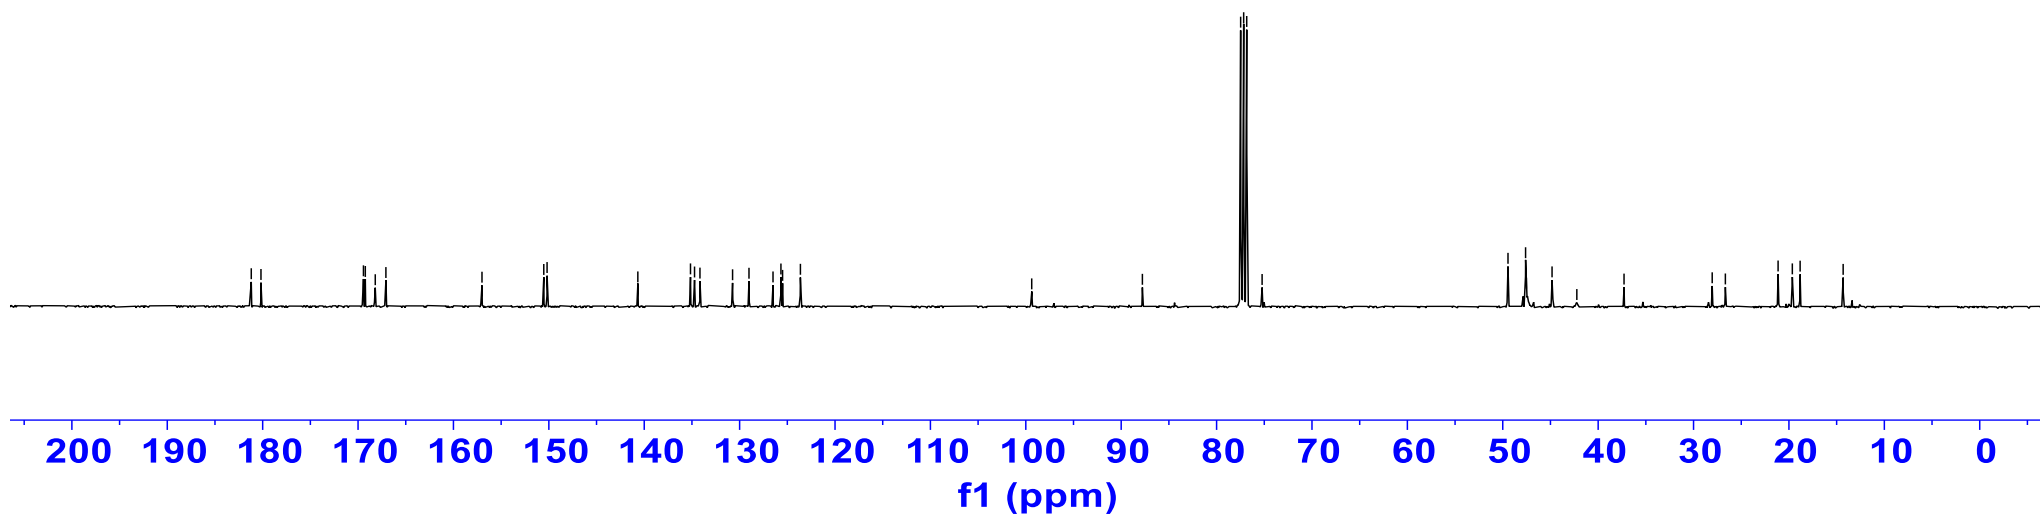

$^{13}\text{C}$  NMR (101 MHz,  $\text{CDCl}_3$ ) spectrum of 5j

x10<sup>5</sup> +ESI Scan (2.765 min) Frag=130.0V 2;.d Subtract (3)

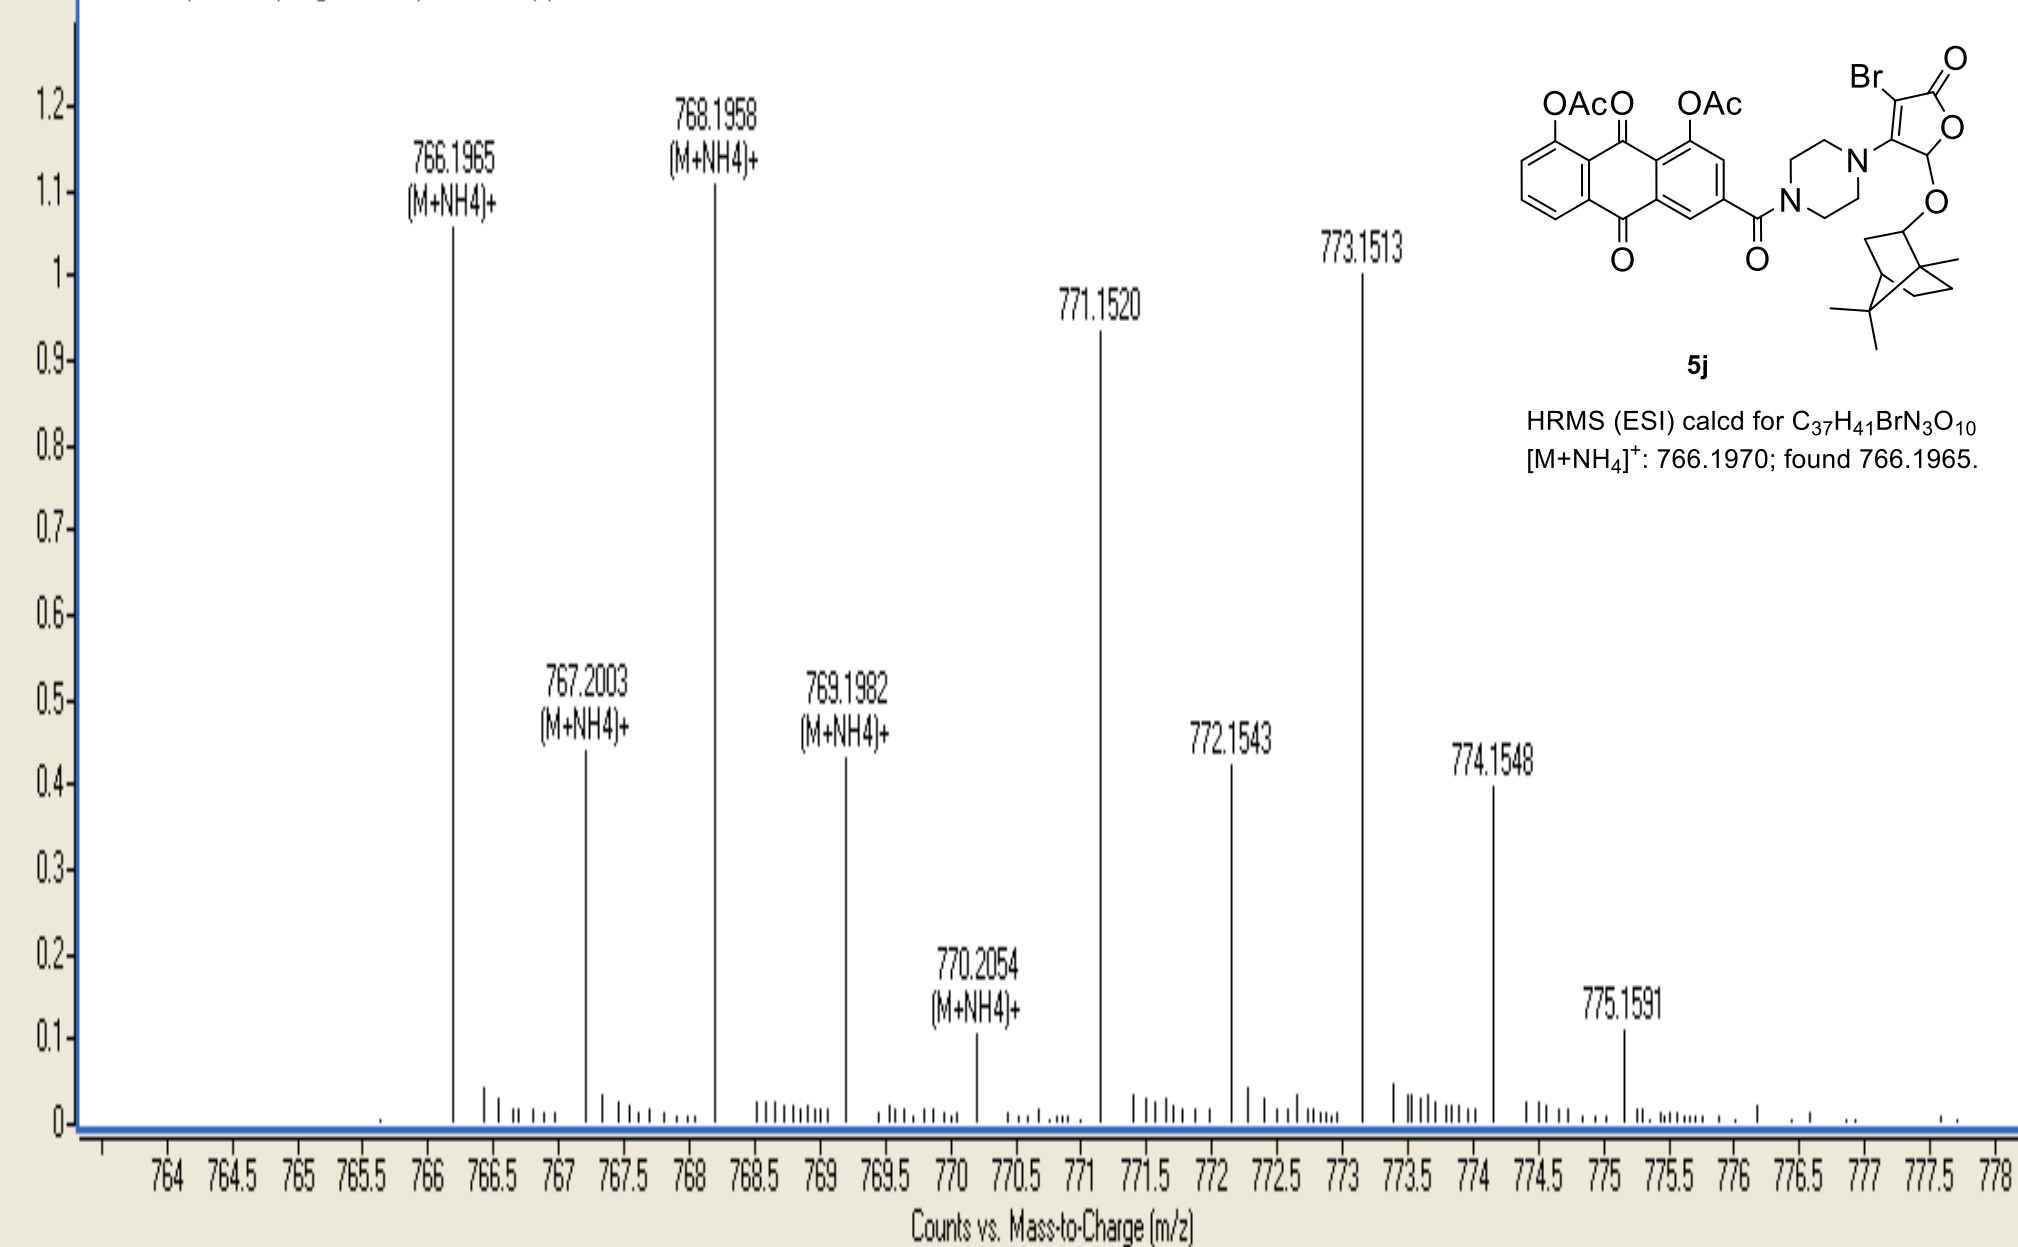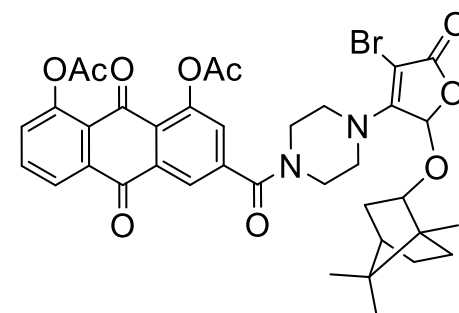

**5j**

HRMS (ESI) calcd for C<sub>37</sub>H<sub>41</sub>BrN<sub>3</sub>O<sub>10</sub>  
[M+NH<sub>4</sub>]<sup>+</sup>: 766.1970; found 766.1965.

HRMS spectrum of **5j**
